# Supplementary material for: Pre-COVID-19 Immunity to Common Cold Human Coronaviruses Induces a Recall-Type IgG Response to SARS-CoV-2 Antigens Without Cross-Neutralisation
Source: Front Immunol. 2022 Feb 11;13:790334. doi: 10.3389/fimmu.2022.790334 (PMC8873934; doi:10.3389/fimmu.2022.790334)
Supplement: Supplementary file 9 [file Table_3.xlsx]

## Sheet: Feuil1
Patient number	Age	F=0 M=1	Smocking	Daily smocker	Former smocker	Hypertension	Diabetes	Type 1	Type 2	Obesity	Overweight	Cancer	Chemo	Arterial thromboembolism	Venous thromboembolisme	Systemic autoimmune disease	Immunodeficiency (HIV, solid organ tranplant)	Chronic pulmonary disease (including asthma)	COPD	SAS	Chronic liver disease	Chronic kidney disease	Chronic neurologic disease	Cardiovascular disease	Mild/moderate	severe	Critical	Time after onset	IgG CoV-2 S1 RBD	IgG CoV-2 S1-F	IgG CoV-2 S2	IgG CoV-2 S1S2	IgG CoV-2 NC	IgG NL-263	IgG OC-43	IgG 229-E	IgG HK-U1	IgM CoV-2 S1 RBD	IgM CoV-2 S1-F	IgM CoV-2 S2	IgM CoV-2 S1S2	IgM CoV-2 NC	IgM NL-263	IgM OC-43	IgM 229-E	IgM HK-U1	IgA CoV-2 S1 RBD	IgA CoV-2 S1-F	IgA CoV-2 S2
Colonne1	Colonne2	Colonne3	Colonne4	Colonne5	Colonne6	Colonne7	Colonne8	Colonne9	Colonne10	Colonne11	Colonne12	Colonne13	Colonne14	Colonne15	Colonne16	Colonne17	Colonne18	Colonne19	Colonne20	Colonne21	Colonne22	Colonne23	Colonne24	Colonne25	Colonne26	Colonne27	Colonne28	Colonne29	Colonne30	Colonne31	Colonne32	Colonne33	Colonne34	Colonne35	Colonne36	Colonne37	Colonne38	Colonne39	Colonne40	Colonne41	Colonne42	Colonne43	Colonne44	Colonne45	Colonne46	Colonne47	Colonne48	Colonne49	Colonne50
1	56	1	1	0	1	0	0	0	0	0	0	1	1	0	0	1	0	0	0	0	0	0	0	0	0	1	0	7	100,24	39,00	81,90	46,09	353,65	4,46	20,03	27,91	28,29	38,74	12,47	2,83	6,72	-2,37	10,01	4,24	11,06	3,92	39,16	15,78	8,08
2	49	1	1	0	1	1	0	0	0	0	1	0	0	0	0	0	0	0	1	0	0	0	0	0	0	1	0	16	41.5019	10.7397	6.01415	9.28951	190.613	146.14	13.2179	26.5676	10.3225	77.465	16.7474	19.9506	9.58441	27.8482	8.5055	4.54556	12.8107	4.87167	20.7473	5.51972	25.9556
3	67	0	1	1	0	1	0	0	0	0	0	1	0	0	0	0	1	1	1	0	0	1	0	0	0	1	0	9	52.9135	8.93631	63.4675	40.1591	386.704	21.3639	43.1409	59.2865	58.6525	21.1238	3.50385	3.55316	4.12349	-11.9014	5.51803	2.43934	9.1838	2.33497	9.64353	5.30705	7.86087
4	36	1	1	0	1	1	1	1	0	1	1	0	0	0	0	0	0	0	0	1	0	0	0	1	0	1	0	4	5.87854	2.86862	4.62392	8.88949	-4.4862	11.5054	16.3873	31.1058	14.5058	15.0702	2.92287	1.8434	4.4584	13.8505	7.87301	5.21112	10.9137	4.89693	2.29908	3.9857	3.22495
5	66	1	0	0	0	0	0	0	0	0	0	0	0	0	0	0	0	0	0	0	0	0	0	0	0	1	0	5	8.24632	3.31377	3.21801	15.1383	17.2288	17.355	21.1196	38.3646	15.9684	20.5031	2.61327	0.987734	3.23791	5.75534	8.93778	4.96381	11.4542	5.23798	4.99242	4.64848	2.60384
6	66	1	1	0	1	0	0	0	0	0	1	0	0	0	0	0	0	0	0	0	0	0	0	0	0	1	0	10	7.86955	3.29341	18.2298	18.0371	64.8825	10.9691	29.8022	29.163	32.9042	53.5164	3.04783	3.86856	7.25407	25.892	19.4869	7.1619	11.8426	6.75316	9.29766	3.05363	2.69819
7	79	0	1	1	0	0	0	0	0	0	0	0	0	0	0	1	0	0	0	0	0	0	0	0	0	1	0	10	6.58227	2.64083	6.19445	20.5954	20.0369	49.4617	12.4163	45.426	15.0468	10.5262	3.10851	2.09065	5.27899	5.45542	6.66619	5.50241	11.1131	5.54232	9.20492	3.58778	5.17491
8	50	1	0	0	0	1	0	0	0	NA	NA	0	0	0	0	0	0	0	0	0	0	1	0	0	0	1	0	5	10.9727	3.48857	20.3889	15.6944	99.228	35.9011	19.6825	20.5841	20.21	33.2731	3.87978	3.1479	4.34368	21.8943	8.0929	4.66642	9.51962	4.13477	9.22477	3.02346	6.71623
9	91	1	1	0	1	1	1	0	1	0	1	0	0	1	0	0	0	0	1	0	0	0	0	1	0	0	1	5	6.23749	2.95276	22.3053	23.0153	8.88272	84.9703	30.4964	22.4293	27.3014	21.0127	3.73559	2.51989	7.47916	9.02827	6.86166	6.36172	11.5988	5.78358	11.604	3.1006	16.0224
10	78	1	1	0	1	1	0	0	0	1	0	0	0	0	0	0	0	0	0	0	0	0	0	1	0	1	0	10	91.6	10.2833	62.5836	45.9663	147.176	9.72837	30.9688	78.4982	41.6214	78.0483	20.317	1.7414	4.21964	13.416	11.3228	4.26332	8.44864	3.42898	22.1469	7.30313	6.71593
11	73	0	0	0	0	1	0	0	0	1	0	0	0	0	0	0	0	0	0	0	0	1	0	0	0	1	0	4	7.27881	3.97632	3.74162	16.5289	4.59327	22.2279	8.76182	21.0177	10.9516	23.5526	2.6914	6.76261	7.45227	10.3805	10.667	8.86111	15.7398	9.04974	11.5847	3.78913	5.50765
12	63	0	0	0	0	0	0	0	0	0	0	0	0	0	0	0	0	0	0	0	0	0	0	0	0	1	0	8	-19.9203	9.14399	43.6999	10.0454	353.155	48.3633	11.3513	21.2488	13.1124	283.209	5.83276	158.612	30.4264	-7.29015	9.8756	5.30795	159.254	12.3026	41.7936	6.58592	7.30134
13	62	0	1	0	1	0	0	0	0	0	0	0	0	0	0	0	0	0	0	0	0	0	0	0	0	1	0	2	182.057	135.18	116.417	55.2718	357.016	8.86243	54.2557	30.3234	72.8379	202.461	24.9145	19.7987	14.2697	22.4551	43.3866	5.43425	11.7111	4.70932	41.0814	18.5619	3.79581
14	48	1	1	0	1	1	0	0	0	0	0	0	0	0	0	0	0	0	0	0	0	0	0	1	0	1	0	11	22.0039	5.6367	10.4603	16.7123	305.457	11.2868	31.0302	21.6605	24.142	35.7221	7.61765	34.643	8.81033	19.0852	20.742	4.72298	9.41792	4.24843	8.39297	2.60585	1.83356
15	64	1	1	0	1	0	1	0	1	1	0	1	1	0	1	0	0	0	0	0	0	0	1	1	0	1	0	11	40.8111	10.9818	24.691	24.1557	154.983	22.5738	26.2925	26.015	29.6074	110.434	22.0323	1.90334	5.29016	141.833	8.62023	3.83795	10.1634	3.57487	13.9162	2.31743	17.7237
16	86	0	0	0	0	1	0	0	0	1	0	0	0	0	0	0	0	0	0	0	0	0	0	0	0	1	0	27	5.50215	3.96774	6.04032	18.714	4.27386	15.7738	13.1967	25.7258	11.3826	40.1505	2.74373	12.9982	9.19518	23.7324	66.613	11.0556	11.6646	11.3408	4.21409	4.6068	6.89771
17	55	0	0	0	0	1	0	0	0	0	0	1	0	0	0	0	0	0	0	0	0	0	0	0	0	1	0	10	140.713	58.949	150.515	83.0677	375.128	71.1618	54.4031	46.433	33.2464	136.497	19.6686	7.74516	6.41771	3.98934	7.37383	3.63863	23.2041	5.00782	27.4824	9.29881	16.4131
18	33	1	1	0	1	0	0	0	0	0	0	0	0	0	0	0	0	0	0	0	0	0	0	0	1	0	0	8	4.36831	3.37574	2.86675	12.7096	3.59404	7.63511	12.2441	28.8356	11.7667	12.0224	2.28223	2.9081	4.74136	9.60062	9.39839	5.16043	10.2112	4.81771	3.45989	4.47845	4.02778
19	63	0	0	0	0	0	0	0	0	0	0	0	0	0	0	1	0	0	0	0	0	0	0	0	0	1	0	9	345.258	228.801	124.04	70.8474	473.358	38.2567	19.1888	20.5527	21.4684	4.6733	-3.14954	9.71328	8.43313	-18.2672	45.3963	3.78509	9.37794	2.55372	10.5603	2.61901	12.0335
20	63	1	0	0	0	0	0	0	0	0	1	0	0	0	0	0	0	0	0	0	1	0	0	0	1	0	0	10	31.4134	12.3325	20.0284	15.0928	153.784	23.8824	7.32667	16.9171	8.49884	62.9927	16.3035	8.9632	7.66819	54.946	13.8451	3.06798	7.02273	2.63434	7.74737	2.71086	5.30105
21	40	1	0	0	0	1	1	0	1	1	1	0	0	0	0	0	0	0	0	0	0	0	0	0	0	1	0	8	210.047	49.7518	53.1046	38.2357	39.5416	27.4673	27.5696	46.022	41.1955	37.9814	13.1295	2.83237	6.40704	11.6314	22.9578	3.79453	6.94375	3.57204	27.5058	3.88799	6.67454
22	57	1	0	0	0	0	0	0	0	0	1	0	0	1	0	1	1	0	0	0	0	1	0	0	0	1	0	9	3.98235	1.55676	4.92565	10.8193	30.8715	20.7213	7.47662	25.5852	10.4897	12.5072	2.54047	3.14103	4.77558	17.2119	9.52593	3.76554	8.2307	3.23503	11.9238	3.64311	6.75067
23	76	0	1	1	0	0	0	0	0	0	0	0	0	0	0	0	0	0	0	0	0	0	0	1	1	0	0	14	60.5486	24.7119	118.155	52.0047	430.284	28.117	80.3654	31.1539	70.2789	30.8394	6.58736	-3.5123	15.0295	-6.61729	5.25812	0.852562	6.99838	0.479964	15.6152	3.83777	4.96938
24	58	0	0	0	0	1	1	0	1	0	1	0	0	0	0	0	0	0	0	0	0	0	0	1	0	0	1	13	8.25904	1.95538	18.332	18.8486	333.159	9.15378	11.2524	19.5576	9.27091	17.1699	4.98163	1.73171	3.66413	-5.0101	7.37636	4.02513	7.7554	3.93773	9.06226	3.14167	8.39857
25	52	0	0	0	0	1	1	0	0	1	0	0	0	0	0	0	0	0	0	0	0	0	0	0	0	1	0	15	183.776	123.576	74.1176	40.289	276.108	13.2572	12.1104	18.5147	11.9664	65.138	18.9488	36.3665	16.7688	0.769779	25.3531	3.15021	7.81062	2.65077	127.06	32.3565	8.14265
26	65	0	0	0	0	0	1	0	1	0	1	1	0	1	1	0	0	0	0	0	1	0	0	1	0	0	1	3	2.2846	1.00409	3.026	10.4261	3.56639	23.5696	6.16945	17.261	6.28175	10.9222	2.35032	2.70223	4.72027	12.3071	21.5966	3.83696	8.47966	4.06297	3.72189	2.76093	2.83452
27	46	0	0	0	0	1	0	0	0	1	1	0	0	0	0	1	0	0	0	0	0	1	0	0	0	1	0	11	25.2805	7.36402	20.7786	31.1728	155.381	8.59145	22.5605	26.2503	40.8207	89.7609	27.0183	5.27074	6.48341	12.5372	11.9453	2.73008	10.0442	1.72303	9.17103	2.73724	5.12413
28	25	1	1	0	1	1	0	0	0	1	1	0	0	0	0	0	0	0	1	0	0	0	0	0	0	1	0	18	361.315	228.733	163.427	93.5542	467.7	36.5245	51.1673	85.0533	63.8947	51.6041	57.8855	44.4555	16.81	-1.8961	16.1813	5.45006	31.1468	6.91485	29.9386	13.807	9.75864
29	62	0	1	0	1	1	0	0	0	0	0	1	0	0	1	0	0	0	0	0	0	1	0	1	0	1	0	21	166.674	98.1785	30.6586	33.8664	423.497	34.467	55.3688	23.7479	40.4887	36.3859	12.3592	4.19602	5.97373	-0.599004	11.1867	3.35847	7.92098	3.66003	93.3552	11.7301	9.17249
30	56	0	1	0	1	0	0	0	0	0	0	0	0	0	1	0	0	0	0	0	0	0	0	0	0	1	0	30	315.436	239.482	155.681	81.1807	452.847	12.1655	52.6688	24.9615	74.6643	55.8068	16.3811	18.7054	17.0743	7.00461	20.0569	10.0117	18.7409	10.8017	15.9918	7.51934	0.650914
31	49	0	0	0	0	1	0	0	0	0	0	1	0	1	0	0	0	0	0	0	0	1	1	1	0	1	0	18	165.554	44.96	162.226	95.9399	330.129	23.6425	54.6682	33.7866	40.0388	22.1519	3.312	3.46288	6.22327	9.22945	11.3114	4.78689	8.37754	4.09553	11.5417	2.52538	9.65013
32	71	0	0	0	0	1	0	0	0	0	0	1	0	0	0	0	0	0	0	0	0	0	1	1	1	0	0	1	8.18922	1.10593	16.0472	27.3288	8.1084	21.577	9.21706	14.9868	16.35	31.2874	2.44533	5.89026	6.83373	12.1718	17.7226	7.10292	9.34425	7.22245	6.00395	4.05334	6.83985
33	59	1	0	0	0	1	0	0	0	0	0	0	0	0	0	0	0	0	0	0	0	0	0	1	0	0	1	12	4.6629	1.57483	4.5081	15.3936	16.4235	3.64691	9.68717	15.1406	20.5496	10.2693	2.04051	2.51985	5.65512	7.00877	6.28326	3.90793	8.18035	3.35923	1.46912	2.65644	1.51154
34	65	0	0	0	0	0	0	0	0	NA	NA	1	1	0	1	0	0	0	0	0	0	0	1	0	0	1	0	14	258.008	195.44	289.515	107.316	382.667	7.06539	30.932	25.0241	21.2387	118.318	35.6027	12.7461	13.2827	2.19542	18.2872	5.61063	11.97	5.54835	8.90007	2.01536	-33.3107
35	83	0	0	0	0	1	0	0	0	0	0	0	0	0	0	0	0	0	0	0	0	1	0	0	0	0	1	8	1.79964	0.52678	1.14303	8.0412	11.9715	2.23962	7.7685	9.82749	5.87205	6.4067	0.913395	0.380695	3.03134	5.0642	4.58042	3.0839	6.37724	2.89986	6.72689	2.79545	4.07749
36	76	1	1	1	0	0	0	0	0	1	1	0	0	0	0	0	0	0	0	0	0	0	0	0	0	1	0	14	15.9526	6.79012	14.0764	18.5589	98.3749	11.374	17.6393	22.2648	19.885	35.916	4.43649	4.54993	6.38735	20.4654	10.2324	4.36724	9.38002	4.11486	8.71546	1.70861	2.28292
37	54	1	1	0	1	0	1	0	1	0	0	0	0	0	0	1	0	0	0	0	0	0	0	1	1	0	0	11	184.272	259.165	216.614	165.735	374.151	11.3998	15.1875	19.5646	15.4482	39.9737	2.19328	1.60833	1.1968	28.0829	7.1319	2.80818	7.52716	2.92832	137.754	50.1786	19.597
38	77	1	0	0	0	0	0	0	0	0	1	0	0	0	0	0	0	0	0	0	0	0	0	0	0	0	1	7	8.227	1.38797	5.12419	18.1878	57.6574	15.3266	7.14876	17.3218	7.286	14.2368	1.23268	4.19915	5.77495	10.2981	16.3801	3.87249	8.50371	3.88855	13.4944	2.87633	8.9598
39	69	1	0	0	0	1	0	0	0	1	1	0	0	0	0	0	0	0	0	1	0	0	0	0	0	1	0	22	360.95	261.148	145.684	81.3875	307.543	24.8752	46.2416	27.2848	60.5918	49.8134	14.1549	2.40373	5.77459	84.8725	6.94231	3.61275	8.39852	3.60339	19.1704	6.80218	20.1406
40	33	1	0	0	0	1	1	0	1	1	0	0	0	0	0	0	0	0	0	0	0	0	0	1	1	0	0	5	7.18364	1.0297	6.83545	17.7397	6.0163	7.49186	11.5671	17.4088	17.1217	16.923	2.01166	5.68536	7.72376	17.2078	17.6717	8.09959	8.99008	7.07211	8.0653	3.44851	6.8844
41	71	1	1	1	0	0	0	0	0	0	0	0	0	0	0	1	0	1	0	0	0	0	0	0	0	1	0	15	163.537	74.0702	73.1838	36.0986	448.243	18.9098	10.814	23.8826	14.6587	36.5735	8.69428	4.89472	13.2644	-5.56904	7.58657	6.30565	13.9737	6.76431	21.0554	7.92555	7.42602
42	47	0	0	0	0	0	0	0	0	0	0	1	0	0	0	0	0	0	0	0	0	0	0	0	0	0	1	2	2.02586	3.10784	3.91916	9.17822	0.373481	17.7916	10.9336	34.4631	9.68182	12.7653	2.06273	1.48086	4.9997	6.62886	17.2827	4.78979	10.9571	5.23861	-1.79761	1.64297	0.25152
43	90	1	0	0	0	1	0	0	0	0	NA	0	0	0	1	0	0	0	0	0	0	0	0	0	1	0	0	1	3.41568	3.81048	3.75613	26.4087	3.50225	15.9454	10.4602	24.4509	7.57075	36.5528	3.22051	2.55689	5.73308	8.85	9.0821	3.92787	11.2179	4.63069	2.7076	3.92829	3.23244
44	58	1	0	0	0	1	1	0	1	NA	NA	0	0	0	0	0	0	0	0	0	0	0	0	1	0	1	0	26	354.82	210.855	135.65	84.2138	473.608	18.8924	70.0651	35.092	51.9725	25.765	10.2815	5.98137	9.69815	-5.1497	14.0401	7.25708	11.8914	6.22939	26.9502	12.5309	9.33008
45	70	1	1	0	1	1	1	0	1	0	1	0	0	0	0	0	0	1	1	0	0	0	0	0	0	0	1	3	10.4022	2.83796	28.7966	25.1195	212.326	29.4762	17.024	24.7361	16.4632	36.1367	4.43327	21.4396	18.1494	80.085	10.0968	4.82384	10.089	4.90399	8.91062	1.83553	6.19534
46	89	1	0	0	0	0	0	0	0	0	0	0	0	0	0	0	0	0	0	0	0	0	0	0	0	1	0	1	9.36516	4.41484	11.2068	21.4263	3.67918	23.2455	11.8562	30.8443	17.4925	11.3313	3.06635	3.18324	7.60856	12.6379	10.5971	4.41378	11.8051	5.47289	4.56798	4.4513	4.54775
47	87	0	1	0	1	1	1	0	1	0	1	0	0	0	1	0	0	1	0	0	0	0	0	1	0	0	1	8	7.24648	4.07914	8.50649	18.1949	27.2873	14.2561	12.4238	23.6412	15.6458	17.7685	4.83407	2.00929	4.91533	10.7682	6.99816	5.13396	9.72521	4.41139	11.1643	4.82652	7.59771
48	96	0	0	0	0	1	1	1	0	0	0	0	0	0	1	0	0	0	0	0	0	1	0	1	1	0	0	1	6.7945	4.01212	7.16007	18.9373	8.83	13.1779	24.5868	23.4238	17.2831	21.4194	2.73319	3.32903	7.5632	15.1846	24.6785	4.43694	10.1687	4.47431	8.70158	4.79762	6.46313
49	60	1	0	0	0	1	0	0	0	1	0	0	0	0	0	0	0	0	0	0	0	0	0	0	0	1	0	9	7.52295	5.69761	54.4953	33.3453	23.6586	8.87981	20.2748	29.8389	13.8104	32.5944	2.87257	16.7675	12.5103	112.341	9.92076	8.63733	10.1913	6.35837	14.4782	4.52209	21.387
50	69	0	0	0	0	0	1	0	1	1	0	0	0	0	0	0	0	0	0	1	0	0	0	0	0	0	1	3	42.1819	2.65814	20.3783	32.3817	9.40208	39.1687	24.2258	54.4258	30.0148	80.4945	2.45442	0.955956	8.39752	13.5614	13.473	3.93375	11.271	4.96653	5.4119	2.45167	2.06618
51	51	0	0	0	0	0	1	0	1	0	0	0	0	0	0	0	0	0	0	0	0	0	0	0	0	1	0	8	34.1643	10.5196	9.56768	19.2013	64.6914	7.68643	24.32	29.1317	17.5419	42.8913	3.04518	9.51021	7.83648	41.617	12.3005	10.7456	16.8126	7.35906	6.67409	1.44111	1.43853
52	92	1	1	0	1	1	1	0	1	0	0	0	0	0	0	0	0	0	0	0	0	0	0	0	1	0	0	1	10.4134	4.72857	3.9757	17.1512	6.40269	15.0186	5.59087	20.2788	7.32393	12.3157	2.6472	3.18627	6.62171	11.1422	8.85873	4.76575	8.48219	5.06639	1.76541	3.14745	3.16894
53	67	0	0	0	0	1	0	0	0	0	0	0	0	0	0	0	0	0	0	0	0	1	0	1	0	1	0	26	274.307	198.648	364.615	183.697	460.776	45.1475	103.253	38.5284	62.5896	248.835	34.5839	6.31449	13.0214	34.4489	28.6067	5.83441	11.2271	5.24118	8.3892	2.50396	15.18
54	82	0	0	0	0	0	0	0	0	0	0	0	0	0	0	0	0	0	0	0	0	0	1	1	1	0	0	2	5.90545	3.38338	8.38796	22.2311	3.37853	74.6637	10.3014	18.244	11.0311	15.2914	2.75204	2.33445	6.82588	11.2711	9.00346	5.26203	9.753	5.06535	8.14717	3.55935	4.21353
55	58	1	0	0	0	1	1	0	1	0	1	0	0	0	0	0	0	0	0	0	0	1	1	1	0	1	0	3	1.31677	-0.528749	8.77366	21.446	11.9394	13.5846	18.5548	27.4281	22.0627	483.804	61.845	6.30147	21.693	21.9916	45.5439	18.6565	14.4124	15.1891	7.07092	0.0361993	4.69048
56	44	1	1	0	1	1	0	0	0	NA	NA	0	0	0	0	0	0	0	0	0	0	0	0	1	0	1	0	13	111.815	37.7949	179.021	102.1	339.908	33.5002	48.5251	27.5095	18.9781	55.4479	11.2705	6.91255	10.4473	8.85647	9.56925	6.89775	15.2422	7.55484	14.3785	2.11085	0.408376
57	64	1	1	1	0	1	1	0	1	0	0	1	1	0	0	0	0	0	0	0	0	0	0	0	0	1	0	2	6.74601	4.91389	6.41342	17.0345	7.99144	16.0159	8.92276	20.8219	8.10468	10.9278	2.78285	2.4801	5.08661	11.6906	7.7653	4.88537	9.09741	4.98064	2.5681	3.76444	4.97522
58	46	1	0	0	0	0	0	0	0	0	0	0	0	0	0	0	0	0	0	0	0	0	0	0	1	0	0	8	6.5806	3.15634	5.48447	15.9012	6.38287	13.8477	10.1603	24.3719	10.8675	15.7701	2.50994	3.04087	7.43311	13.6755	8.33832	5.63695	8.72734	6.14236	6.82543	3.86886	5.12484
59	78	1	0	0	0	1	1	0	1	0	NA	0	0	0	0	0	0	1	0	0	0	0	0	1	1	0	0	16	209.73	202.024	164.688	133.753	379.891	13.7518	55.315	38.0971	48.544	112.266	16.9099	0.556666	2.75577	6.43564	5.54019	2.02936	8.06767	2.1687	30.9109	86.3112	13.0306
60	71	1	1	0	1	1	0	0	0	0	0	0	0	0	0	0	0	0	0	0	0	0	0	0	0	1	0	23	359.047	287.347	177.792	137.549	584.222	243.269	81.147	78.5227	105.421	37.1201	5.9778	4.14539	7.53265	-9.51498	5.90142	12.7299	21.534	8.47842	29.6351	4.72722	92.9657
61	73	1	0	0	0	0	0	0	0	0	0	0	0	0	0	0	0	0	0	0	0	0	0	0	1	0	0	15	11.9059	3.85656	10.8734	13.3881	7.01135	48.5962	24.8852	41.7293	24.7319	28.6826	5.74073	5.67599	5.31381	8.95836	17.4134	8.0839	17.6876	8.17737	2.85542	3.29427	3.73664
62	43	0	0	0	0	1	0	0	0	1	0	0	0	0	0	0	0	0	1	0	0	0	0	0	0	1	0	7	13.0989	4.15866	9.521	17.1841	26.6881	6.91751	18.9247	35.4095	17.5227	29.2973	1.94194	1.702	3.47426	12.9272	16.2642	3.80847	11.5825	5.25846	6.33546	2.79605	4.2768
63	88	1	1	0	1	0	0	0	0	1	1	0	0	0	0	0	0	0	0	0	0	0	0	0	0	1	0	9	4.96808	3.15555	6.07632	13.0026	5.87914	14.6583	21.7799	28.9608	15.668	10.3735	2.51518	2.78542	2.93074	8.00745	5.55853	3.89699	13.4024	5.41746	2.86536	2.8098	3.55318
64	39	0	NA	NA	NA	0	1	0	1	1	1	0	0	0	0	0	0	0	0	0	0	0	0	0	0	1	0	19	11.521	5.74045	9.68987	21.4115	26.5364	13.5926	20.8545	27.8203	14.7207	11.6734	4.03153	5.04997	9.1796	9.86544	9.77011	8.69787	12.7626	7.80925	61.1707	27.8024	5.68144
65	71	0	0	0	0	0	1	0	1	0	0	0	0	0	0	0	0	0	0	0	0	1	0	1	0	1	0	9	29.1529	12.2871	12.3412	17.3283	310.111	37.3605	34.4817	25.9757	28.1348	39.3593	9.79233	6.85303	4.78081	114.955	7.94527	9.37959	13.8417	7.29968	10.2714	3.13534	6.67888
66	49	1	0	0	0	1	0	0	0	1	0	0	0	0	0	0	0	0	0	0	0	1	0	0	0	1	0	9	5.73412	3.29869	9.86425	15.8592	89.958	13.1888	29.7244	27.7029	11.9801	57.6439	4.47025	9.95091	7.02398	44.6916	16.5639	3.82256	21.2394	6.09408	7.48194	1.56305	1.97168
67	91	1	0	0	0	1	1	0	1	0	1	0	0	0	0	0	0	0	0	0	0	1	0	0	0	0	1	6	3.98747	5.03377	5.19234	14.3823	12.3071	8.1202	6.66026	23.4482	8.20363	22.2391	3.25339	4.4138	3.68156	15.9619	41.1566	5.19225	12.6788	5.11804	8.06213	4.255	6.57184
68	54	1	1	0	1	0	0	0	0	0	0	0	0	0	0	0	0	0	0	0	0	0	0	0	0	1	0	10	17.1691	3.96887	11.9257	19.8928	45.716	8.61983	20.9753	24.4092	30.5085	26.5748	6.32571	4.17834	4.67927	11.3186	12.4602	5.42454	10.8169	5.54647	7.48126	1.1664	3.74972
69	53	0	0	0	0	0	1	0	0	1	0	0	0	0	0	0	1	0	0	0	0	1	0	1	0	1	0	13	168.488	143.684	188.478	87.4002	531.407	35.0739	13.6941	17.6602	13.0131	318.563	57.619	32.3742	11.9257	-9.92653	13.2401	7.45596	12.7055	6.55283	26.7442	14.9967	9.13439
70	63	0	0	0	0	0	0	0	0	0	0	0	0	0	0	0	0	0	0	0	0	0	0	0	0	1	0	10	25.4669	24.321	10.0496	12.2345	88.2719	74.6267	6.79259	29.0305	8.96943	20.219	3.40084	5.38394	4.39149	15.0699	6.40281	3.84519	10.3059	4.50379	77.4562	25.9706	8.63589
71	71	1	1	0	1	1	1	0	1	0	0	0	0	0	0	0	0	1	1	1	1	0	0	0	0	1	0	15	38.3592	38.1779	11.1313	15.8631	155.282	72.6134	7.26986	28.7353	9.71443	20.0386	2.37692	7.1871	4.26962	44.621	6.19124	4.70035	10.4875	4.85407	159.232	52.4575	17.6861
72	73	0	0	0	0	1	1	0	1	0	0	0	0	0	0	0	0	0	0	1	0	0	0	1	1	0	0	2	10.7412	3.88454	12.9105	17.1535	19.4648	13.7004	8.87464	31.1411	15.3164	41.6446	9.16063	7.67569	4.19162	73.7111	6.90748	3.74139	9.3442	4.25658	8.59393	2.26324	7.5751
73	74	1	0	0	0	0	0	0	0	1	0	0	0	0	0	0	0	0	0	0	0	0	0	0	0	1	0	14	8.3899	45.4868	6.18117	20.7393	59.1542	16.759	10.4632	28.9386	14.656	16.5711	0.689211	6.00619	4.04974	9.52999	9.8861	5.80361	11.9974	6.22631	8.99068	4.95613	4.73548
74	65	0	0	0	0	1	0	0	0	0	0	0	0	0	0	0	0	0	0	0	0	1	0	0	0	1	0	13	85.9258	51.0581	366.302	98.0955	191.79	32.6259	54.4818	23.5322	39.9387	76.5396	22.7712	31.3621	28.3004	15.4773	8.79598	21.357	11.3481	12.4854	103.55	17.5434	37.7852
75	82	0	0	0	0	1	0	0	0	0	NA	0	0	0	0	0	0	0	0	0	0	0	0	0	1	0	0	16	8.81363	3.43489	5.54167	13.6899	20.2519	38.7358	17.3764	34.8397	10.8511	86.0388	3.35194	3.83212	5.44987	19.081	21.1094	5.6708	11.6148	6.59739	19.3513	3.51919	6.61728
76	51	1	0	0	0	0	0	0	0	0	0	0	0	0	0	0	0	0	0	0	0	0	0	0	0	1	0	9	14.3557	5.14365	220.126	59.5672	0.377179	7.24331	14.7919	25.9997	12.609	44.0821	7.2046	5.05484	5.88486	20.7857	18.5922	8.63386	11.7479	8.67636	65.2397	14.6563	3.85059
77	55	1	1	0	1	0	1	0	1	0	0	0	0	0	0	0	0	0	0	0	0	0	0	0	1	0	0	12	159.145	121.838	209.313	81.3217	504.759	13.636	128.141	28.927	104.159	247.784	59.458	73.9891	36.6372	7.89353	9.1579	6.76017	76.9407	7.82868	50.7066	23.4207	7.9133
78	32	1	0	0	0	0	1	0	1	0	0	0	0	0	0	0	0	0	0	0	0	0	0	0	0	1	0	3	17.8298	8.29828	13.6036	16.9162	302.223	20.8447	36.2174	31.7966	21.5854	102.117	25.5603	10.9128	10.42	87.447	23.707	10.7092	13.7555	7.86478	11.2405	4.66937	6.04993
79	62	0	0	0	0	0	0	0	0	0	0	1	0	0	1	0	0	1	0	0	0	0	0	1	0	1	0	14	60.0616	34.6967	35.4069	21.9655	198.993	13.1763	9.95308	21.6821	11.169	177.974	47.2934	8.38924	5.05329	14.0434	6.95948	4.64753	8.78789	4.36377	44.8897	6.03692	22.5685
80	61	0	0	0	0	1	0	0	0	0	1	0	0	0	0	0	0	0	0	0	0	0	0	1	0	1	0	28	256.305	181.801	217.853	79.7158	495.15	19.0991	54.8107	30.3295	37.3125	208.293	87.0998	18.3414	14.9458	52.898	15.3331	3.58622	11.2296	4.54094	122.89	13.8008	-9.81764
81	54	0	0	0	0	0	1	0	1	0	1	0	0	0	1	0	0	0	0	0	0	0	1	0	0	1	0	19	36.607	12.8689	24.3548	31.0584	103.059	42.9843	32.1021	44.1582	34.6541	67.3351	19.1934	4.30659	7.16366	24.1333	23.2539	5.03978	10.618	4.47757	31.5751	10.2551	6.9754
82	54	1	1	0	1	0	0	0	0	0	0	0	0	0	0	0	0	0	0	0	0	0	0	0	1	0	0	11	32.7441	13.7399	13.24	25.5889	55.3627	11.2198	14.1146	25.3781	22.5418	30.5025	7.68337	20.5869	12.1178	12.1553	55.1368	3.41166	8.82642	3.28428	14.6572	4.45676	9.89865
83	29	1	1	0	1	1	0	0	0	0	0	1	1	0	0	0	0	0	0	0	0	1	0	1	0	1	0	25	83.7294	110.085	402.931	149.715	436.652	14.1588	47.2193	47.6108	30.5386	47.2625	14.2981	-1.18721	8.36917	25.3919	25.5593	6.10202	11.2773	6.08596	289.647	135.87	-19.1124
84	45	1	1	0	1	1	1	0	1	0	1	0	0	0	0	0	0	0	0	0	0	0	0	0	0	1	0	19	109.866	167.827	445.099	203.989	416.298	0.957161	80.341	28.1214	61.4602	539.377	240.228	102.784	46.2133	133.065	423.455	2.39032	8.93937	3.09154	18.6778	10.6198	2.43091
85	42	0	1	0	1	1	0	0	0	0	0	0	0	0	0	0	0	0	0	0	0	1	1	0	0	1	0	11	28.3478	10.4251	167.484	69.4059	561.863	-0.0210741	19.7917	23.2278	27.9912	60.824	20.5526	22.535	12.1921	-0.619152	106.659	6.22679	9.93899	6.02971	127.636	41.6534	2.13142
86	43	0	1	0	1	0	0	0	0	1	0	0	0	0	0	0	0	0	0	0	0	0	0	0	0	1	0	33	381.467	316.175	395.847	186.704	555.868	8.00753	62.0567	27.3432	57.6763	31.0274	7.1015	-5.05331	1.71656	-9.28988	17.0923	2.93574	10.8272	2.93541	-3.64304	15.9839	11.4005
87	83	0	1	0	1	1	0	0	0	0	0	0	0	0	0	0	0	0	1	0	0	1	0	1	0	1	0	13	8.67328	4.14189	31.0759	23.9975	354.401	60.0625	12.2802	22.1658	10.766	49.9448	4.86492	13.9051	9.20628	7.39155	16.9546	6.56902	16.2282	7.0893	20.3518	8.85419	5.15078
88	72	0	1	0	1	0	1	0	1	1	0	0	0	0	1	0	0	0	0	0	0	0	0	1	0	1	0	37	209.925	130.704	84.7056	48.0694	472.928	10.422	32.3109	23.4282	31.8347	13.4969	-0.66373	0.181766	2.19993	39.4905	11.8854	3.45295	8.16551	2.86697	53.3204	11.6352	2.22744
89	69	0	0	0	0	1	0	0	0	1	1	0	0	0	0	0	0	0	0	0	0	1	0	0	0	0	1	6	41.9711	29.1982	17.3128	19.8295	461.196	7.80223	19.4973	15.9412	16.9024	66.8883	18.2972	12.4196	10.2959	14.5464	8.06072	8.79077	14.6636	8.65356	223.126	77.4898	4.13936
90	76	1	1	0	1	1	1	0	1	0	1	0	0	0	0	1	0	0	0	0	0	0	0	1	1	0	0	5	5.55624	3.66328	5.08968	13.2624	224.455	6.20736	11.4283	26.4778	10.2099	16.2756	2.3263	2.99325	5.3846	153.245	14.6239	4.58144	9.37651	4.75074	3.6527	2.02341	2.06806
91	54	1	1	0	1	1	0	0	0	1	0	0	0	0	0	0	0	0	0	0	0	0	1	1	0	1	0	18	196.606	131.475	53.5486	38.8561	493.751	73.084	19.9519	27.596	25.1212	54.8674	11.5267	12.0069	7.44816	12.0716	7.95598	3.992	9.315	4.73504	29.1511	15.6936	4.40403
92	69	0	0	0	0	0	0	0	0	0	0	0	0	0	0	1	0	0	0	0	0	0	0	0	0	1	0	13	154.126	104.986	321.709	128.759	475.961	66.2617	45.1663	48.2384	31.4705	132.116	54.068	-1.40634	2.54126	0.00907687	12.4262	3.56896	8.27088	3.52799	9.74008	2.10415	-4.63782
93	43	0	0	0	0	0	1	1	0	0	0	0	0	0	0	0	0	0	0	0	0	1	0	0	0	1	0	23	206.242	130.832	82.381	43.7207	486.629	6.92386	14.62	21.5764	11.3881	49.313	29.1621	4.0815	5.7869	0.32647	3.10004	4.68503	9.48279	4.8889	27.943	1.81139	9.17017
94	37.2329	1	0	0	0	0	0	0	0	1	0	0	0	0	0	0	0	0	0	0	0	0	0	0	0	0	1	11	334.092	223.672	107.295	148.986	273.861	53.7205	167.561	24.4375	119.487	34.0307	16.1959	55.3725	47.9019	28.6016	18.5965	13.9442	16.8104	15.4855	38.1645	19.9159	190.691
95	70.4219	1	0	0	0	0	1	0	1	0	0	0	0	1	0	0	0	1	0	1	0	0	1	0	0	0	1	5	329.561	43.9272	78.8034	47.0716	415.427	10.8257	70.8071	26.0032	37.3566	26.6329	23.6895	12.8876	20.6396	8.04374	45.6888	17.0763	15.3072	18.6357	22.3221	9.60171	12.3461
96	42.3397	0	0	0	0	0	0	0	0	1	0	0	0	0	0	0	0	0	0	0	0	0	0	0	0	0	1	11	94.8938	39.1029	110.733	50.6197	50.0407	138.324	145.586	17.6675	98.0185	51.2526	26.3655	19.5933	29.0259	41.9178	118.707	20.3698	18.2478	22.2302	22.0924	5.47248	21.8184
97	63.4466	1	1	0	1	1	1	0	1	1	0	0	0	0	0	0	0	1	1	0	0	0	0	1	0	0	1	6	12.9311	5.96802	14.7561	18.3803	9.03703	48.1319	32.9559	30.5773	19.3988	18.1249	8.93934	11.1317	16.8532	15.1631	13.6594	16.3616	14.8726	14.8766	22.2498	9.58093	6.38781
98	55.0466	1	0	0	0	0	1	0	1	0	1	0	0	0	0	0	0	0	0	0	0	0	0	1	0	0	1	11	207.599	390.012	249.962	279.623	380.696	61.3069	195.965	23.222	113.102	43.3382	-3.44163	14.3403	14.1229	0.802897	34.9919	22.1293	29.6812	21.4878	209.073	41.1558	80.4486
99	48.1507	1	0	0	0	1	0	0	0	1	0	0	0	0	0	0	0	0	0	0	0	0	0	0	0	0	1	7	254.882	120.591	158.654	92.4873	278.547	22.1829	50.6782	13.4502	16.6952	137.083	66.6149	24.9891	30.5321	50.2759	59.3872	22.0456	18.4782	17.8028	48.3266	21.349	-55.7218
100	53.5918	0	0	0	0	0	1	0	1	1	0	0	0	0	0	0	0	0	0	0	0	0	0	0	0	0	1	8	90.9119	35.5408	120.884	45.3728	347.286	20.1927	80.364	21.1657	48.2157	73.6607	36.3026	17.2255	27.1758	0.0712982	22.9014	21.6632	18.683	20.3009	63.2405	12.1489	5.32603
101	54.4027	1	0	0	0	1	0	0	0	1	0	0	0	0	0	0	0	0	0	0	0	0	0	0	0	0	1	7	205.307	63.0296	175.389	115.317	339.764	22.352	223.696	38.0269	146.228	48.9976	19.5987	122.9	130.421	-1.4905	23.3518	18.8287	17.1873	19.434	138.127	31.6662	22.836
102	64.9205	1	0	0	0	0	0	0	0	0	0	0	0	0	0	0	0	0	0	0	0	0	0	0	0	0	1	8	364.921	269.047	403.491	302.743	167.129	149.908	260.61	22.6866	83.2656	32.0803	15.7814	27.7359	36.3467	18.4681	164.23	12.5937	17.5808	16.8925	108.092	41.2495	55.9732
103	74.6192	1	0	0	0	1	0	0	0	0	1	1	0	0	0	0	0	0	0	0	0	0	0	0	0	0	1	7	86.6408	11.1702	8.63953	11.2677	35.7712	38.1221	38.6821	10.7198	14.6208	43.7079	21.9651	27.9099	33.9638	52.1496	14.9912	24.6943	16.5608	23.8938	122.46	13.7792	194.206
104	63.6712	1	0	0	0	1	0	0	0	1	0	0	0	0	0	0	0	0	0	0	0	1	0	0	0	0	1	9	25.343	22.7765	26.4838	14.8112	331.039	10.5685	66.5328	16.0996	50.9716	80.4204	43.9561	14.1736	22.0179	-9.39857	24.0416	14.7339	15.5945	15.5673	157.103	5.70838	97.3423
105	53.3726	0	0	0	0	0	1	0	1	1	0	0	0	0	0	0	0	1	0	0	0	0	0	0	0	0	1	11	74.1249	51.433	89.1764	53.5469	11.6994	18.2724	130.465	15.1429	96.938	74.169	30.0634	11.4928	20.1277	11.7805	15.1671	14.715	16.2541	14.9291	72.5427	15.7727	36.7639
106	61	1	1	0	1	0	0	0	0	1	1	0	0	0	0	0	0	0	0	0	0	0	0	0	0	0	1	9	115.676	42.7525	68.6471	29.4364	67.6881	19.3382	60.098	16.7034	52.0534	120.753	60.9427	15.3996	23.7717	16.073	19.5407	18.7047	16.1917	17.4617	15.1358	4.77131	5.65802
107	25.0493	1	0	0	0	0	0	0	0	1	0	0	0	0	0	0	0	0	0	0	0	0	0	0	0	0	1	7	350.83	198.084	246.686	166.641	267.86	53.7166	230.641	31.7697	110.012	99.614	49.9478	11.5982	29.1682	10.5064	28.2148	19.4704	23.5226	20.9698	20.1741	11.7284	1.59777
108	52.9726	1	0	0	0	0	0	0	0	0	1	0	0	0	0	0	0	0	0	0	0	0	0	0	0	0	1	13	290.1	182.105	114.29	102.731	221.501	14.4331	71.1477	18.1738	33.4266	67.1915	29.0725	14.4737	27.7244	8.73765	21.2192	17.8658	18.7896	18.458	86.8264	43.172	54.3908
109	70.7288	0	0	0	0	0	0	0	0	0	0	0	0	0	0	0	0	0	0	0	0	0	0	0	0	0	1	6	216.538	53.1418	71.4346	44.8308	84.6014	10.5875	59.3141	16.6467	27.52	29.8199	14.7007	6.9616	17.2289	12.7858	18.8069	18.0455	17.0193	16.0174	32.8183	10.0849	13.5617
110	43.3288	1	0	0	0	0	0	0	0	1	0	0	0	0	0	0	0	0	0	0	0	0	0	0	0	0	1	13	304.803	167.046	165.82	89.5839	165.274	75.2198	158.301	13.3962	74.8377	36.948	31.1467	73.8179	87.9818	13.8595	24.3697	23.0895	15.8452	21.1667	88.4484	14.4471	46.0741
111	74.2904	1	1	0	1	1	1	0	1	0	1	0	0	1	0	0	0	0	0	0	0	0	0	0	0	0	1	12	232.097	117.187	69.4028	36.0164	287.611	0.0489344	129.294	17.2891	58.9782	53.4969	29.3647	8.01092	21.1172	3.78738	11.0924	17.4635	17.8075	18.1725	37.2867	7.71791	4.58765
112	54.389	1	0	0	0	1	0	0	0	0	1	0	0	0	0	0	1	0	0	0	0	1	0	0	0	0	1	8	62.9859	20.4828	46.7549	64.976	38.6577	32.4162	57.9782	12.1811	47.2582	89.552	34.2029	13.5568	18.5	13.7844	21.3832	20.1143	15.1043	17.8384	54.3348	17.826	36.9027
113	59.674	0	0	0	0	1	1	0	1	1	0	0	0	0	0	0	0	0	0	0	0	0	0	0	0	0	1	12	340.842	187.132	50.0074	68.2274	130.196	9.3474	73.3844	9.48115	54.926	31.6711	12.2866	11.8504	18.5926	11.5755	14.3768	23.2983	17.3555	18.3577	12.9459	6.80176	13.8289
114	72	1	0	0	0	1	1	0	1	0	1	0	0	0	0	0	0	0	0	0	0	0	0	1	0	0	1	7	274.294	163.394	296.86	153.197	146.74	20.2572	55.4481	16.5963	24.1682	64.2445	28.817	13.31	24.3245	13.7971	27.9281	20.7198	18.2677	20.7907	37.2502	15.211	-31.0094
115	58.1041	1	0	0	0	1	0	0	0	0	1	0	0	0	0	0	0	0	0	0	0	0	0	0	0	0	1	13	257.842	168.238	372.161	267.604	212.957	9.79455	228.479	13.1602	119.684	86.0846	36.7179	-13.3054	4.77045	2.32407	17.7426	13.9371	17.5942	16.9724	73.2176	22.2428	-98.5467
116	53.8521	0	0	0	0	0	0	0	0	0	1	0	0	0	0	0	0	1	0	0	0	0	0	0	0	0	1	5	159.428	79.5757	384.815	209.517	61.9142	22.0265	204.847	17.0633	125.423	288.67	97.8262	24.6299	29.7366	74.5576	77.4644	24.1421	18.1505	21.3913	29.9186	18.8726	2.5617
117	33.3589	0	0	0	0	1	1	0	1	1	0	0	0	0	0	0	0	0	0	0	0	0	0	0	0	0	1	8	133.667	91.9462	232.678	167.625	130.73	17.6254	284.505	37.0954	126.416	191.505	52.1632	8.21997	22.4108	8.54467	19.2017	10.0369	19.04	15.5915	95.1698	31.2278	-2.4923
118	39.8521	1	0	0	0	1	0	0	0	0	1	0	0	0	0	0	0	0	0	0	0	0	0	0	0	0	1	8	303.689	177.721	349.022	187.681	184.579	11.5616	170.867	11.7997	126.013	141.611	46.2273	36.0754	48.8613	13.6968	69.3763	17.3179	11.2632	32.5822	15.9805	3.75589	-3.16231
119	66.3945	0	0	0	0	1	0	0	0	1	0	1	0	0	0	0	0	0	0	0	0	0	0	0	0	0	1	14	333.207	322.589	281.643	323.752	230.791	36.0563	301.632	21.179	112.571	9.19541	1.93027	-2.78912	17.7529	29.3826	11.6132	-0.133079	6.89601	6.93896	52.1499	22.5227	72.5853
120	50.3781	1	0	0	0	1	1	0	1	0	1	0	0	1	0	0	0	0	0	0	0	0	0	0	0	0	1	11	285.301	168.049	386.206	221.813	158.951	12.705	194.318	30.3811	118.439	25.6274	7.74994	16.2303	14.6849	-7.40708	14.145	2.01163	5.79341	5.09253	45.1844	16.3775	2.44349
121	57.9096	1	0	0	0	1	0	0	0	0	1	0	0	0	0	0	0	0	0	0	0	0	0	0	0	0	1	14	278.483	185.714	137.123	107.359	46.2827	7.84657	211.698	9.70191	99.71	121.222	20.9755	6.02891	9.57536	17.5567	8.7626	4.54212	7.93542	5.00236	21.2845	10.844	11.1055
122	51.9616	1	0	0	0	0	0	0	0	1	0	0	0	0	0	0	0	0	0	0	0	0	0	0	0	0	1	11	208.906	150.496	248.051	132.176	239.974	39.1083	184.146	12.1043	109.311	278.132	119.457	12.5671	53.5031	16.2214	10.1284	1.19086	6.52909	4.52487	52.9064	17.6928	50.7774
123	48.6	1	0	0	0	0	1	0	1	1	0	0	0	0	0	0	0	0	0	0	0	0	0	0	0	0	1	7	259.415	162.396	286.049	246.703	98.5681	11.6233	244.083	9.99666	90.5493	67.2854	24.019	-4.67845	3.6214	25.7434	10.0962	1.97902	8.42961	5.38484	70.0542	37.8927	8.21241
124	59.9096	1	0	0	0	1	0	0	0	0	1	1	0	0	0	0	0	0	0	0	0	1	0	0	0	0	1	7	334.061	181.572	165.651	93.2555	474.242	18.7375	56.8335	20.9173	31.7623	75.7635	22.2748	3.19832	26.9556	77.0936	38.8811	9.14689	8.04289	8.72472	116.344	32.6261	38.182
125	31.9315	1	0	0	0	0	0	0	0	0	1	0	0	0	0	0	0	0	0	0	0	0	0	0	0	0	1	6	381.411	226.394	257.621	140.433	473.389	15.1995	239.931	52.0291	121.894	138.043	52.914	11.1235	22.0853	-10.2763	17.9111	5.69208	4.74798	9.01686	36.4665	32.5999	48.7652
126	55.8329	1	1	0	1	1	0	0	0	1	0	0	0	0	0	0	0	0	0	0	0	0	0	1	0	0	1	15	400.253	238.901	128.028	97.6934	273.127	8.33135	116.802	32.7046	88.9885	27.2061	28.1418	2.66663	89.7226	24.8398	9.1803	5.36147	7.16409	5.99721	32.2666	20.1271	244.18
127	50.8877	1	0	0	0	1	0	0	0	1	0	0	0	0	0	0	1	0	0	0	0	1	0	0	0	0	1	21	165.898	104.684	186.787	87.8208	155.773	7.73971	112.843	20.7467	38.4192	81.6025	24.4928	20.3065	13.3992	23.2076	11.8479	2.20688	6.45214	5.03706	179.65	43.5505	17.8001
128	55.3205	1	1	0	1	1	1	0	1	1	0	0	0	0	0	0	0	0	0	0	0	0	0	0	0	0	1	13	127.717	61.0847	252.864	176.613	83.6826	18.5436	241.294	57.6563	137.798	423.796	177.387	4.81436	12.2537	10.0085	14.994	5.85223	8.3609	6.82194	18.7902	13.3522	19.6766
129	41.9288	1	0	0	0	1	1	0	1	1	0	0	0	0	0	0	0	0	0	0	0	0	0	0	0	0	1	11	381.025	278.319	526.429	389.806	416.327	32.7204	323.561	63.5372	147.118	197.464	66.6473	4.40031	15.1697	0.976657	24.463	5.49975	10.2342	6.05447	15.9065	9.78873	-60.8335
130	57.0466	0	0	0	0	1	0	0	0	1	0	0	0	0	0	0	0	0	0	0	0	0	0	0	0	0	1	8	400.308	282.154	252.21	189.528	386.888	9.24172	131.349	49.5152	84.7939	30.4838	11.819	298.498	202.57	71.2711	69.3619	26.0611	62.7774	39.8758	-19.4916	-0.289839	-37.2335
131	57.1178	1	0	0	0	0	0	0	0	0	1	0	0	0	0	0	0	0	0	0	0	0	0	0	0	0	1	7	202.857	149.571	478.18	418.812	324.919	34.6601	430.552	16.1549	137.392	333.548	215.382	28.9356	68.9451	-2.19011	27.4926	2.80994	7.53203	8.36879	80.9289	33.0486	-30.0576
132	62.1151	0	0	0	0	1	0	0	0	0	1	0	0	0	0	0	0	1	0	0	0	0	0	0	0	0	1	11	322.413	264.111	290.076	201.391	329.826	9.20607	152.877	25.9653	32.277	34.85	10.0088	24.2077	26.0183	1.79559	24.3679	15.4693	26.802	14.0102	74.2269	19.6301	4.73102
133	55.2411	0	0	0	0	0	0	0	0	1	0	0	0	0	0	0	0	0	0	0	0	0	0	0	0	0	1	17	326.445	283.804	404.882	368.793	286.045	22.8085	268.62	25.7956	88.9748	182.706	33.3619	33.8997	55.5333	75.3616	25.8625	10.9875	10.7537	32.7103	14.7023	10.0815	-46.1075
134	46.3808	1	0	0	0	1	0	0	0	1	0	0	0	0	0	0	0	0	0	0	0	0	0	0	0	0	1	17	216.146	139.983	215.165	104.021	217.49	6.99178	202.164	56.8488	74.7081	127.559	59.9051	71.6915	52.2062	-12.1935	14.3767	5.92627	8.44019	7.95616	28.949	15.1892	11.305
135	62.4219	0	0	0	0	1	1	0	1	1	0	0	0	0	0	0	1	0	0	0	1	1	0	0	0	0	1	7	7.628	4.38215	12.9871	13.6194	12.231	13.8008	26.034	15.4844	15.9974	12.0246	5.00903	3.58328	10.4473	9.8328	14.0246	9.99627	8.35532	9.447	9.2372	3.58105	4.3174
136	54.0575	1	0	0	0	0	0	0	0	0	1	0	0	0	0	0	0	0	0	0	0	0	0	0	0	0	1	21	364.311	308.125	342.039	219.112	303.156	17.9906	103.755	16.0745	69.4356	120.207	63.9667	4.49219	87.0242	-8.14824	21.9532	74.9708	85.0045	58.4984	-13.8062	-9.00169	-70.1447
137	61	1	0	0	0	0	0	0	0	0	0	0	0	0	0	0	0	0	0	0	0	0	0	0	0	0	1	13	280.362	257.325	373.232	344.808	294.48	19.7592	317.298	23.0005	141.338	66.3622	25.5263	4.81003	14.385	0.0604231	9.30014	1.24782	6.83146	4.80671	223.893	126.77	2.79112
138	58.3918	1	0	0	0	1	0	0	0	0	1	0	0	0	0	0	0	0	0	0	0	0	0	0	0	0	1	2	247.366	225.864	114.402	167.999	337.837	33.7671	111.171	75.495	71.9995	87.3331	39.3081	30.2495	31.3278	-1.22756	106.003	19.447	15.5113	15.5671	16.8432	41.8713	5.00661
139	63.1452	0	0	0	0	0	1	0	1	0	0	0	0	0	0	0	0	0	0	0	0	0	0	0	0	0	1	9	296.466	212.371	148.992	117.045	220.875	10.6877	138.866	61.029	84.9535	36.7366	19.1749	11.769	22.4279	8.66303	14.1378	17.5454	12.9444	14.5513	97.0612	25.1871	30.2216
140	61.8164	1	0	0	0	1	0	0	0	0	1	0	0	0	0	0	1	0	0	0	0	0	0	0	0	0	1	22	194.599	207.871	111.059	103.451	246.955	60.432	104.291	35.3296	44.8883	178.304	64.0558	330.351	325.034	-2.86779	20.6709	9.21287	10.087	10.1381	46.1013	17.1936	100.868
141	35.8932	1	0	0	0	0	0	0	0	0	1	0	0	0	0	0	0	0	0	0	0	0	0	0	0	0	1	10	214.37	215.205	379.398	354.238	264.198	11.0871	76.1434	20.2477	57.3705	39.5456	13.2454	3.42347	4.51551	9.39596	9.61251	4.35999	7.94896	6.86469	-12.4764	54.3875	-1.60912
142	76.0055	1	0	0	0	0	0	0	0	0	1	0	0	0	0	0	0	0	0	0	0	0	0	0	0	0	1	6	20.6327	18.0059	18.3967	19.5822	60.7793	4.10561	52.7656	11.8116	28.0566	392.33	97.2528	18.3511	29.7999	13.6692	30.8267	20.9027	15.9041	19.8027	13.7325	7.07988	8.98576
143	69.0219	1	0	0	0	1	1	0	1	0	1	0	0	0	0	0	0	1	0	0	0	0	0	0	0	0	1	7	313.102	272.733	489.575	409.214	208.856	39.7121	389.288	42.8896	198.282	71.4579	22.154	-1.65435	9.25555	16.8713	45.9165	11.596	21.4515	22.1661	18.1852	32.7308	-0.228409
144	35.5397	1	0	0	0	0	0	0	0	1	0	0	0	0	0	0	0	0	0	0	0	0	0	0	0	0	1	11	273.995	253.348	355.012	335.131	169.172	19.4647	118.934	24.3486	67.0331	47.4488	11.3656	-1.34364	4.48131	2.81759	17.0732	6.24673	6.02878	6.20134	20.3267	14.0418	-16.3081
145	48	1	0	0	0	0	1	0	1	1	0	0	0	0	0	0	0	0	0	0	0	0	0	0	0	0	1	6	44.7405	10.9508	47.5234	41.0898	221.402	18.0537	119.782	38.4331	47.417	12.7198	4.26949	4.21078	10.5107	9.19147	33.869	8.27047	5.50855	9.61786	7.89315	4.564	4.8016
146	61	0	0	0	0	1	1	0	1	1	0	0	0	0	0	0	1	0	0	0	0	1	0	0	1	0	0	3	3.80292	3.12327	0.855356	14.4836	-5.13162	4.592	5.10087	16.7162	6.26353	111.976	19.4296	40.1281	62.528	14.6164	41.942	30.848	19.3383	20.4615	30.6268	4.07018	6.1592
147	29	0	0	0	0	0	0	0	0	0	0	0	0	0	0	0	0	0	0	0	0	0	0	0	1	0	0	16	43.9159	14.4249	7.42781	22.0169	31.7739	11.6017	4.40221	21.8266	6.3597	32.9913	3.28998	11.9767	7.34678	17.9901	29.7309	7.13845	8.93923	6.02413	-0.659558	1.18572	-0.495263
148	43	0	0	0	0	0	0	0	0	1	0	0	0	0	0	0	0	0	0	0	0	0	0	0	1	0	0	10	11.0538	4.1084	9.79789	24.2957	0.402418	20.1699	7.98568	23.0849	10.6373	47.8597	9.06057	4.53723	8.39479	9.8326	12.8515	4.45821	8.15656	4.57536	9.7874	4.85961	7.9447
149	31	0	0	0	0	0	0	0	0	0	0	0	0	0	0	0	0	0	0	0	0	0	0	0	1	0	0	8	4.27673	3.98859	5.45693	20.182	2.53769	9.01796	10.3614	21.7797	10.3007	15.3935	3.58893	3.01782	5.80973	5.36666	7.48503	4.14171	8.34201	4.29476	6.91931	3.78002	5.39537
150	30	0	0	0	0	0	0	0	0	0	0	0	0	0	0	0	0	0	0	0	0	0	0	0	1	0	0	5	6.92633	4.31679	8.81852	42.0026	3.54177	16.0032	7.88592	33.7531	11.2429	26.4405	3.00637	3.4633	8.21963	11.8186	15.7512	4.17347	8.93416	4.95744	7.22666	4.1982	3.16771
151	50	0	0	0	0	0	0	0	0	0	0	0	0	0	0	0	0	0	0	0	0	0	0	0	1	0	0	10	16.8126	6.33786	17.8869	24.0282	28.5926	27.4221	18.3731	27.6264	14.9452	31.2741	4.73412	9.83517	8.72403	17.7209	22.7814	7.30859	11.0583	6.95722	2.64311	2.16786	3.0503
152	43	1	0	0	0	0	0	0	0	0	0	0	0	0	0	0	0	0	0	0	0	0	0	0	1	0	0	12	3.73222	3.20051	4.71993	14.8495	5.05808	51.7055	10.5491	20.766	8.78973	37.2862	6.8746	11.066	12.741	11.3806	40.9507	5.13156	8.97137	6.03698	36.1923	12.6182	7.71783
153	27	0	0	0	0	0	0	0	0	0	0	0	0	0	0	1	0	0	0	0	0	0	0	0	1	0	0	18	22.8849	9.06449	38.0112	44.1547	16.8173	10.135	6.6187	17.3556	8.59961	28.3789	3.44401	3.92473	7.88396	4.7867	19.7268	3.74453	8.36327	4.68645	-0.46116	0.641728	3.01704
154	39	0	0	0	0	0	0	0	0	0	0	0	0	0	1	1	0	0	0	0	0	1	0	0	1	0	0	7	2.25736	4.09742	4.17452	17.7687	0.137922	8.31139	4.35639	12.2133	18.1168	31.0726	8.19534	4.52589	7.92589	8.65715	9.79799	4.00923	8.04562	4.97434	4.23275	2.35535	1.39913
155	50	0	0	0	0	0	0	0	0	0	1	0	0	0	0	0	0	0	0	0	0	0	0	0	1	0	0	1	2.97782	2.6838	5.14644	26.1491	9.23097	15.2193	16.0418	21.4902	12.2606	25.6719	3.70525	5.66253	12.8455	5.72161	10.7883	6.27978	10.3564	7.68279	2.52205	2.6561	3.04286
156	40	0	0	0	0	0	0	0	0	0	0	0	0	0	0	0	0	0	0	0	0	0	0	1	1	0	0	4	124.707	85.459	71.0287	38.0223	186.459	19.8931	12.1536	23.8843	13.2217	13.5693	2.61281	2.46273	5.94187	11.4522	21.7482	3.96205	7.26161	4.85653	2.79253	1.30555	2.5066
157	55	0	0	0	0	1	1	0	1	0	0	0	0	1	0	0	0	0	0	0	0	0	0	0	1	0	0	6	6.77498	2.28541	6.03183	14.2161	4.9085	12.3933	13.4444	35.3202	9.51633	72.1895	6.93032	15.7688	11.0773	10.9393	5.63449	5.28584	35.8786	9.36148	3.17363	1.86477	0.317727
158	41	1	0	0	0	0	0	0	0	0	0	0	0	0	0	0	0	0	0	0	0	0	0	0	1	0	0	4	70.966	28.8531	162.95	100.329	407.13	9.9713	9.26102	17.5731	13.272	11.7151	2.32522	-0.302779	4.187	9.6515	10.1318	3.67612	5.69009	4.39381	4.1942	0.83963	0.104626
159	60	0	0	0	0	0	0	0	0	0	0	0	0	0	0	1	0	0	0	0	0	0	0	0	1	0	0	2	13.7036	3.70832	5.77145	12.9346	94.7649	20.0228	9.682	25.7188	13.1688	159.401	66.6032	6.19501	8.3337	-11.6131	11.0935	3.87136	7.57636	3.65915	24.0507	9.53633	10.8091
160	53	1	0	0	0	0	1	0	1	0	0	0	0	0	0	0	0	1	0	1	0	0	0	0	1	0	0	10	119.115	58.0362	76.9257	42.0932	23.7127	7.08458	25.3314	13.9812	44.5299	42.3258	8.37949	1.56199	5.99186	63.5786	10.224	2.86809	5.86364	3.46351	8.37329	1.0886	3.42622
161	32	0	0	0	0	0	0	0	0	0	0	0	0	0	0	0	0	0	0	0	0	0	0	0	1	0	0	7	5.82831	1.99488	1.54839	38.8715	5.30559	9.01315	4.47813	13.4222	7.55501	87.0216	17.8851	5.42967	6.64414	226.053	13.4115	4.54111	8.22986	4.03115	13.7429	3.12162	14.9912
162	24	0	0	0	0	0	0	0	0	0	0	0	0	0	0	0	0	1	0	0	0	0	0	0	1	0	0	9	9.69871	3.34909	2.84539	12.5643	70.3719	5.23697	13.9266	31.9596	10.7514	13.454	2.06284	1.75574	4.22769	13.8865	24.0036	4.19281	6.82159	4.3835	1.23707	1.31503	0.824335
163	57	1	0	0	0	0	1	0	1	0	1	0	0	0	0	0	0	0	0	0	0	0	0	1	1	0	0	5	134.798	34.4642	58.2415	30.9843	8.74241	17.1006	38.2015	25.1587	29.6936	85.6816	27.3941	4.42461	4.51938	17.3535	5.50822	3.59122	6.69347	4.29268	11.6854	3.17435	4.47315
164	33	1	0	0	0	0	0	0	0	0	0	0	0	0	0	0	0	0	0	0	0	0	0	0	1	0	0	8	7.41759	2.38439	24.3117	22.0301	212.51	38.1798	18.481	26.51	21.3007	42.5022	15.2112	57.7753	37.3113	12.1402	8.3432	6.50245	8.44668	8.04941	77.3413	37.3134	6.91983
165	54	1	0	0	0	0	0	0	0	0	0	0	0	0	0	0	0	1	0	0	0	0	0	0	1	0	0	7	2.54123	0.9391	0.0876	8.3754	0.456511	8.78462	4.83607	13.1542	5.6695	53.9731	10.8882	6.93858	6.29258	136.646	21.7455	5.37454	13.4694	4.07774	1.55791	1.01659	1.40379
166	28	0	0	0	0	0	0	0	0	0	0	1	1	0	0	0	1	0	0	0	0	0	0	0	1	0	0	9	9.0967	0.974207	8.46199	16.7675	10.5386	5.54761	15.3753	30.5925	17.3963	14.3271	2.47004	5.20956	7.13282	9.80755	8.27965	4.52888	7.54716	5.40262	2.20888	0.712365	2.73022
167	57	1	0	0	0	0	0	0	0	0	0	0	0	0	0	1	0	1	0	0	0	0	0	0	1	0	0	7	8.34564	2.87469	9.3853	17.6657	8.45622	10.0757	8.85369	19.0228	9.42741	8.25626	1.97872	-0.196245	2.76027	7.18811	5.59041	3.6906	6.46601	3.79392	3.02632	2.43262	3.94443
[truncated: 6 more columns]

## Sheet: Feuil2
Patient number	Age	F=0 M=1	Smocking	Daily smocker	Former smocker	Hypertension	Diabetes	Type 1	Type 2	Obesity	Overweight	Cancer	Chemo	Arterial thromboembolism	Venous thromboembolisme	Systemic autoimmune disease	Immunodeficiency (HIV, solid organ tranplant)	Chronic pulmonary disease (including asthma)	COPD	SAS	Chronic liver disease	Chronic kidney disease	Chronic neurologic disease	Cardiovascular disease	Mild/moderate	severe	Critical	Time after onset	IgG CoV-2 S1 RBD	IgG CoV-2 S1-F	IgG CoV-2 S2	IgG CoV-2 S1S2	IgG CoV-2 NC	IgG NL-263	IgG OC-43	IgG 229-E	IgG HK-U1	IgM CoV-2 S1 RBD	IgM CoV-2 S1-F	IgM CoV-2 S2	IgM CoV-2 S1S2	IgM CoV-2 NC	IgM NL-263	IgM OC-43	IgM 229-E	IgM HK-U1	IgA CoV-2 S1 RBD	IgA CoV-2 S1-F	IgA CoV-2 S2
1	56	1	1	0	1	0	0	0	0	0	0	1	1	0	0	1	0	0	0	0	0	0	0	0	0	1	0	7	100,24	39,00	81,90	46,09	353,65	4,46	20,03	27,91	28,29	38,74	12,47	2,83	6,72	-2,37	10,01	4,24	11,06	3,92	39,16	15,78	8,08
2	49	1	1	0	1	1	0	0	0	0	1	0	0	0	0	0	0	0	1	0	0	0	0	0	0	1	0	16	41.5019	10.7397	6.01415	9.28951	190.613	146.14	13.2179	26.5676	10.3225	77.465	16.7474	19.9506	9.58441	27.8482	8.5055	4.54556	12.8107	4.87167	20.7473	5.51972	25.9556
3	67	0	1	1	0	1	0	0	0	0	0	1	0	0	0	0	1	1	1	0	0	1	0	0	0	1	0	9	52.9135	8.93631	63.4675	40.1591	386.704	21.3639	43.1409	59.2865	58.6525	21.1238	3.50385	3.55316	4.12349	-11.9014	5.51803	2.43934	9.1838	2.33497	9.64353	5.30705	7.86087
4	36	1	1	0	1	1	1	1	0	1	1	0	0	0	0	0	0	0	0	1	0	0	0	1	0	1	0	4	5.87854	2.86862	4.62392	8.88949	-4.4862	11.5054	16.3873	31.1058	14.5058	15.0702	2.92287	1.8434	4.4584	13.8505	7.87301	5.21112	10.9137	4.89693	2.29908	3.9857	3.22495
5	66	1	0	0	0	0	0	0	0	0	0	0	0	0	0	0	0	0	0	0	0	0	0	0	0	1	0	5	8.24632	3.31377	3.21801	15.1383	17.2288	17.355	21.1196	38.3646	15.9684	20.5031	2.61327	0.987734	3.23791	5.75534	8.93778	4.96381	11.4542	5.23798	4.99242	4.64848	2.60384
6	66	1	1	0	1	0	0	0	0	0	1	0	0	0	0	0	0	0	0	0	0	0	0	0	0	1	0	10	7.86955	3.29341	18.2298	18.0371	64.8825	10.9691	29.8022	29.163	32.9042	53.5164	3.04783	3.86856	7.25407	25.892	19.4869	7.1619	11.8426	6.75316	9.29766	3.05363	2.69819
7	79	0	1	1	0	0	0	0	0	0	0	0	0	0	0	1	0	0	0	0	0	0	0	0	0	1	0	10	6.58227	2.64083	6.19445	20.5954	20.0369	49.4617	12.4163	45.426	15.0468	10.5262	3.10851	2.09065	5.27899	5.45542	6.66619	5.50241	11.1131	5.54232	9.20492	3.58778	5.17491
8	50	1	0	0	0	1	0	0	0	NA	NA	0	0	0	0	0	0	0	0	0	0	1	0	0	0	1	0	5	10.9727	3.48857	20.3889	15.6944	99.228	35.9011	19.6825	20.5841	20.21	33.2731	3.87978	3.1479	4.34368	21.8943	8.0929	4.66642	9.51962	4.13477	9.22477	3.02346	6.71623
9	91	1	1	0	1	1	1	0	1	0	1	0	0	1	0	0	0	0	1	0	0	0	0	1	0	0	1	5	6.23749	2.95276	22.3053	23.0153	8.88272	84.9703	30.4964	22.4293	27.3014	21.0127	3.73559	2.51989	7.47916	9.02827	6.86166	6.36172	11.5988	5.78358	11.604	3.1006	16.0224
10	78	1	1	0	1	1	0	0	0	1	0	0	0	0	0	0	0	0	0	0	0	0	0	1	0	1	0	10	91.6	10.2833	62.5836	45.9663	147.176	9.72837	30.9688	78.4982	41.6214	78.0483	20.317	1.7414	4.21964	13.416	11.3228	4.26332	8.44864	3.42898	22.1469	7.30313	6.71593
11	73	0	0	0	0	1	0	0	0	1	0	0	0	0	0	0	0	0	0	0	0	1	0	0	0	1	0	4	7.27881	3.97632	3.74162	16.5289	4.59327	22.2279	8.76182	21.0177	10.9516	23.5526	2.6914	6.76261	7.45227	10.3805	10.667	8.86111	15.7398	9.04974	11.5847	3.78913	5.50765
12	63	0	0	0	0	0	0	0	0	0	0	0	0	0	0	0	0	0	0	0	0	0	0	0	0	1	0	8	-19.9203	9.14399	43.6999	10.0454	353.155	48.3633	11.3513	21.2488	13.1124	283.209	5.83276	158.612	30.4264	-7.29015	9.8756	5.30795	159.254	12.3026	41.7936	6.58592	7.30134
13	62	0	1	0	1	0	0	0	0	0	0	0	0	0	0	0	0	0	0	0	0	0	0	0	0	1	0	2	182.057	135.18	116.417	55.2718	357.016	8.86243	54.2557	30.3234	72.8379	202.461	24.9145	19.7987	14.2697	22.4551	43.3866	5.43425	11.7111	4.70932	41.0814	18.5619	3.79581
14	48	1	1	0	1	1	0	0	0	0	0	0	0	0	0	0	0	0	0	0	0	0	0	1	0	1	0	11	22.0039	5.6367	10.4603	16.7123	305.457	11.2868	31.0302	21.6605	24.142	35.7221	7.61765	34.643	8.81033	19.0852	20.742	4.72298	9.41792	4.24843	8.39297	2.60585	1.83356
15	64	1	1	0	1	0	1	0	1	1	0	1	1	0	1	0	0	0	0	0	0	0	1	1	0	1	0	11	40.8111	10.9818	24.691	24.1557	154.983	22.5738	26.2925	26.015	29.6074	110.434	22.0323	1.90334	5.29016	141.833	8.62023	3.83795	10.1634	3.57487	13.9162	2.31743	17.7237
16	86	0	0	0	0	1	0	0	0	1	0	0	0	0	0	0	0	0	0	0	0	0	0	0	0	1	0	27	5.50215	3.96774	6.04032	18.714	4.27386	15.7738	13.1967	25.7258	11.3826	40.1505	2.74373	12.9982	9.19518	23.7324	66.613	11.0556	11.6646	11.3408	4.21409	4.6068	6.89771
17	55	0	0	0	0	1	0	0	0	0	0	1	0	0	0	0	0	0	0	0	0	0	0	0	0	1	0	10	140.713	58.949	150.515	83.0677	375.128	71.1618	54.4031	46.433	33.2464	136.497	19.6686	7.74516	6.41771	3.98934	7.37383	3.63863	23.2041	5.00782	27.4824	9.29881	16.4131
18	33	1	1	0	1	0	0	0	0	0	0	0	0	0	0	0	0	0	0	0	0	0	0	0	1	0	0	8	4.36831	3.37574	2.86675	12.7096	3.59404	7.63511	12.2441	28.8356	11.7667	12.0224	2.28223	2.9081	4.74136	9.60062	9.39839	5.16043	10.2112	4.81771	3.45989	4.47845	4.02778
19	63	0	0	0	0	0	0	0	0	0	0	0	0	0	0	1	0	0	0	0	0	0	0	0	0	1	0	9	345.258	228.801	124.04	70.8474	473.358	38.2567	19.1888	20.5527	21.4684	4.6733	-3.14954	9.71328	8.43313	-18.2672	45.3963	3.78509	9.37794	2.55372	10.5603	2.61901	12.0335
20	63	1	0	0	0	0	0	0	0	0	1	0	0	0	0	0	0	0	0	0	1	0	0	0	1	0	0	10	31.4134	12.3325	20.0284	15.0928	153.784	23.8824	7.32667	16.9171	8.49884	62.9927	16.3035	8.9632	7.66819	54.946	13.8451	3.06798	7.02273	2.63434	7.74737	2.71086	5.30105
21	40	1	0	0	0	1	1	0	1	1	1	0	0	0	0	0	0	0	0	0	0	0	0	0	0	1	0	8	210.047	49.7518	53.1046	38.2357	39.5416	27.4673	27.5696	46.022	41.1955	37.9814	13.1295	2.83237	6.40704	11.6314	22.9578	3.79453	6.94375	3.57204	27.5058	3.88799	6.67454
22	57	1	0	0	0	0	0	0	0	0	1	0	0	1	0	1	1	0	0	0	0	1	0	0	0	1	0	9	3.98235	1.55676	4.92565	10.8193	30.8715	20.7213	7.47662	25.5852	10.4897	12.5072	2.54047	3.14103	4.77558	17.2119	9.52593	3.76554	8.2307	3.23503	11.9238	3.64311	6.75067
23	76	0	1	1	0	0	0	0	0	0	0	0	0	0	0	0	0	0	0	0	0	0	0	1	1	0	0	14	60.5486	24.7119	118.155	52.0047	430.284	28.117	80.3654	31.1539	70.2789	30.8394	6.58736	-3.5123	15.0295	-6.61729	5.25812	0.852562	6.99838	0.479964	15.6152	3.83777	4.96938
24	58	0	0	0	0	1	1	0	1	0	1	0	0	0	0	0	0	0	0	0	0	0	0	1	0	0	1	13	8.25904	1.95538	18.332	18.8486	333.159	9.15378	11.2524	19.5576	9.27091	17.1699	4.98163	1.73171	3.66413	-5.0101	7.37636	4.02513	7.7554	3.93773	9.06226	3.14167	8.39857
25	52	0	0	0	0	1	1	0	0	1	0	0	0	0	0	0	0	0	0	0	0	0	0	0	0	1	0	15	183.776	123.576	74.1176	40.289	276.108	13.2572	12.1104	18.5147	11.9664	65.138	18.9488	36.3665	16.7688	0.769779	25.3531	3.15021	7.81062	2.65077	127.06	32.3565	8.14265
26	65	0	0	0	0	0	1	0	1	0	1	1	0	1	1	0	0	0	0	0	1	0	0	1	0	0	1	3	2.2846	1.00409	3.026	10.4261	3.56639	23.5696	6.16945	17.261	6.28175	10.9222	2.35032	2.70223	4.72027	12.3071	21.5966	3.83696	8.47966	4.06297	3.72189	2.76093	2.83452
27	46	0	0	0	0	1	0	0	0	1	1	0	0	0	0	1	0	0	0	0	0	1	0	0	0	1	0	11	25.2805	7.36402	20.7786	31.1728	155.381	8.59145	22.5605	26.2503	40.8207	89.7609	27.0183	5.27074	6.48341	12.5372	11.9453	2.73008	10.0442	1.72303	9.17103	2.73724	5.12413
28	25	1	1	0	1	1	0	0	0	1	1	0	0	0	0	0	0	0	1	0	0	0	0	0	0	1	0	18	361.315	228.733	163.427	93.5542	467.7	36.5245	51.1673	85.0533	63.8947	51.6041	57.8855	44.4555	16.81	-1.8961	16.1813	5.45006	31.1468	6.91485	29.9386	13.807	9.75864
29	62	0	1	0	1	1	0	0	0	0	0	1	0	0	1	0	0	0	0	0	0	1	0	1	0	1	0	21	166.674	98.1785	30.6586	33.8664	423.497	34.467	55.3688	23.7479	40.4887	36.3859	12.3592	4.19602	5.97373	-0.599004	11.1867	3.35847	7.92098	3.66003	93.3552	11.7301	9.17249
30	56	0	1	0	1	0	0	0	0	0	0	0	0	0	1	0	0	0	0	0	0	0	0	0	0	1	0	30	315.436	239.482	155.681	81.1807	452.847	12.1655	52.6688	24.9615	74.6643	55.8068	16.3811	18.7054	17.0743	7.00461	20.0569	10.0117	18.7409	10.8017	15.9918	7.51934	0.650914
31	49	0	0	0	0	1	0	0	0	0	0	1	0	1	0	0	0	0	0	0	0	1	1	1	0	1	0	18	165.554	44.96	162.226	95.9399	330.129	23.6425	54.6682	33.7866	40.0388	22.1519	3.312	3.46288	6.22327	9.22945	11.3114	4.78689	8.37754	4.09553	11.5417	2.52538	9.65013
32	71	0	0	0	0	1	0	0	0	0	0	1	0	0	0	0	0	0	0	0	0	0	1	1	1	0	0	1	8.18922	1.10593	16.0472	27.3288	8.1084	21.577	9.21706	14.9868	16.35	31.2874	2.44533	5.89026	6.83373	12.1718	17.7226	7.10292	9.34425	7.22245	6.00395	4.05334	6.83985
33	59	1	0	0	0	1	0	0	0	0	0	0	0	0	0	0	0	0	0	0	0	0	0	1	0	0	1	12	4.6629	1.57483	4.5081	15.3936	16.4235	3.64691	9.68717	15.1406	20.5496	10.2693	2.04051	2.51985	5.65512	7.00877	6.28326	3.90793	8.18035	3.35923	1.46912	2.65644	1.51154
34	65	0	0	0	0	0	0	0	0	NA	NA	1	1	0	1	0	0	0	0	0	0	0	1	0	0	1	0	14	258.008	195.44	289.515	107.316	382.667	7.06539	30.932	25.0241	21.2387	118.318	35.6027	12.7461	13.2827	2.19542	18.2872	5.61063	11.97	5.54835	8.90007	2.01536	-33.3107
35	83	0	0	0	0	1	0	0	0	0	0	0	0	0	0	0	0	0	0	0	0	1	0	0	0	0	1	8	1.79964	0.52678	1.14303	8.0412	11.9715	2.23962	7.7685	9.82749	5.87205	6.4067	0.913395	0.380695	3.03134	5.0642	4.58042	3.0839	6.37724	2.89986	6.72689	2.79545	4.07749
36	76	1	1	1	0	0	0	0	0	1	1	0	0	0	0	0	0	0	0	0	0	0	0	0	0	1	0	14	15.9526	6.79012	14.0764	18.5589	98.3749	11.374	17.6393	22.2648	19.885	35.916	4.43649	4.54993	6.38735	20.4654	10.2324	4.36724	9.38002	4.11486	8.71546	1.70861	2.28292
37	54	1	1	0	1	0	1	0	1	0	0	0	0	0	0	1	0	0	0	0	0	0	0	1	1	0	0	11	184.272	259.165	216.614	165.735	374.151	11.3998	15.1875	19.5646	15.4482	39.9737	2.19328	1.60833	1.1968	28.0829	7.1319	2.80818	7.52716	2.92832	137.754	50.1786	19.597
38	77	1	0	0	0	0	0	0	0	0	1	0	0	0	0	0	0	0	0	0	0	0	0	0	0	0	1	7	8.227	1.38797	5.12419	18.1878	57.6574	15.3266	7.14876	17.3218	7.286	14.2368	1.23268	4.19915	5.77495	10.2981	16.3801	3.87249	8.50371	3.88855	13.4944	2.87633	8.9598
39	69	1	0	0	0	1	0	0	0	1	1	0	0	0	0	0	0	0	0	1	0	0	0	0	0	1	0	22	360.95	261.148	145.684	81.3875	307.543	24.8752	46.2416	27.2848	60.5918	49.8134	14.1549	2.40373	5.77459	84.8725	6.94231	3.61275	8.39852	3.60339	19.1704	6.80218	20.1406
40	33	1	0	0	0	1	1	0	1	1	0	0	0	0	0	0	0	0	0	0	0	0	0	1	1	0	0	5	7.18364	1.0297	6.83545	17.7397	6.0163	7.49186	11.5671	17.4088	17.1217	16.923	2.01166	5.68536	7.72376	17.2078	17.6717	8.09959	8.99008	7.07211	8.0653	3.44851	6.8844
41	71	1	1	1	0	0	0	0	0	0	0	0	0	0	0	1	0	1	0	0	0	0	0	0	0	1	0	15	163.537	74.0702	73.1838	36.0986	448.243	18.9098	10.814	23.8826	14.6587	36.5735	8.69428	4.89472	13.2644	-5.56904	7.58657	6.30565	13.9737	6.76431	21.0554	7.92555	7.42602
42	47	0	0	0	0	0	0	0	0	0	0	1	0	0	0	0	0	0	0	0	0	0	0	0	0	0	1	2	2.02586	3.10784	3.91916	9.17822	0.373481	17.7916	10.9336	34.4631	9.68182	12.7653	2.06273	1.48086	4.9997	6.62886	17.2827	4.78979	10.9571	5.23861	-1.79761	1.64297	0.25152
43	90	1	0	0	0	1	0	0	0	0	NA	0	0	0	1	0	0	0	0	0	0	0	0	0	1	0	0	1	3.41568	3.81048	3.75613	26.4087	3.50225	15.9454	10.4602	24.4509	7.57075	36.5528	3.22051	2.55689	5.73308	8.85	9.0821	3.92787	11.2179	4.63069	2.7076	3.92829	3.23244
44	58	1	0	0	0	1	1	0	1	NA	NA	0	0	0	0	0	0	0	0	0	0	0	0	1	0	1	0	26	354.82	210.855	135.65	84.2138	473.608	18.8924	70.0651	35.092	51.9725	25.765	10.2815	5.98137	9.69815	-5.1497	14.0401	7.25708	11.8914	6.22939	26.9502	12.5309	9.33008
45	70	1	1	0	1	1	1	0	1	0	1	0	0	0	0	0	0	1	1	0	0	0	0	0	0	0	1	3	10.4022	2.83796	28.7966	25.1195	212.326	29.4762	17.024	24.7361	16.4632	36.1367	4.43327	21.4396	18.1494	80.085	10.0968	4.82384	10.089	4.90399	8.91062	1.83553	6.19534
46	89	1	0	0	0	0	0	0	0	0	0	0	0	0	0	0	0	0	0	0	0	0	0	0	0	1	0	1	9.36516	4.41484	11.2068	21.4263	3.67918	23.2455	11.8562	30.8443	17.4925	11.3313	3.06635	3.18324	7.60856	12.6379	10.5971	4.41378	11.8051	5.47289	4.56798	4.4513	4.54775
47	87	0	1	0	1	1	1	0	1	0	1	0	0	0	1	0	0	1	0	0	0	0	0	1	0	0	1	8	7.24648	4.07914	8.50649	18.1949	27.2873	14.2561	12.4238	23.6412	15.6458	17.7685	4.83407	2.00929	4.91533	10.7682	6.99816	5.13396	9.72521	4.41139	11.1643	4.82652	7.59771
48	96	0	0	0	0	1	1	1	0	0	0	0	0	0	1	0	0	0	0	0	0	1	0	1	1	0	0	1	6.7945	4.01212	7.16007	18.9373	8.83	13.1779	24.5868	23.4238	17.2831	21.4194	2.73319	3.32903	7.5632	15.1846	24.6785	4.43694	10.1687	4.47431	8.70158	4.79762	6.46313
49	60	1	0	0	0	1	0	0	0	1	0	0	0	0	0	0	0	0	0	0	0	0	0	0	0	1	0	9	7.52295	5.69761	54.4953	33.3453	23.6586	8.87981	20.2748	29.8389	13.8104	32.5944	2.87257	16.7675	12.5103	112.341	9.92076	8.63733	10.1913	6.35837	14.4782	4.52209	21.387
50	69	0	0	0	0	0	1	0	1	1	0	0	0	0	0	0	0	0	0	1	0	0	0	0	0	0	1	3	42.1819	2.65814	20.3783	32.3817	9.40208	39.1687	24.2258	54.4258	30.0148	80.4945	2.45442	0.955956	8.39752	13.5614	13.473	3.93375	11.271	4.96653	5.4119	2.45167	2.06618
51	51	0	0	0	0	0	1	0	1	0	0	0	0	0	0	0	0	0	0	0	0	0	0	0	0	1	0	8	34.1643	10.5196	9.56768	19.2013	64.6914	7.68643	24.32	29.1317	17.5419	42.8913	3.04518	9.51021	7.83648	41.617	12.3005	10.7456	16.8126	7.35906	6.67409	1.44111	1.43853
52	92	1	1	0	1	1	1	0	1	0	0	0	0	0	0	0	0	0	0	0	0	0	0	0	1	0	0	1	10.4134	4.72857	3.9757	17.1512	6.40269	15.0186	5.59087	20.2788	7.32393	12.3157	2.6472	3.18627	6.62171	11.1422	8.85873	4.76575	8.48219	5.06639	1.76541	3.14745	3.16894
53	67	0	0	0	0	1	0	0	0	0	0	0	0	0	0	0	0	0	0	0	0	1	0	1	0	1	0	26	274.307	198.648	364.615	183.697	460.776	45.1475	103.253	38.5284	62.5896	248.835	34.5839	6.31449	13.0214	34.4489	28.6067	5.83441	11.2271	5.24118	8.3892	2.50396	15.18
54	82	0	0	0	0	0	0	0	0	0	0	0	0	0	0	0	0	0	0	0	0	0	1	1	1	0	0	2	5.90545	3.38338	8.38796	22.2311	3.37853	74.6637	10.3014	18.244	11.0311	15.2914	2.75204	2.33445	6.82588	11.2711	9.00346	5.26203	9.753	5.06535	8.14717	3.55935	4.21353
55	58	1	0	0	0	1	1	0	1	0	1	0	0	0	0	0	0	0	0	0	0	1	1	1	0	1	0	3	1.31677	-0.528749	8.77366	21.446	11.9394	13.5846	18.5548	27.4281	22.0627	483.804	61.845	6.30147	21.693	21.9916	45.5439	18.6565	14.4124	15.1891	7.07092	0.0361993	4.69048
56	44	1	1	0	1	1	0	0	0	NA	NA	0	0	0	0	0	0	0	0	0	0	0	0	1	0	1	0	13	111.815	37.7949	179.021	102.1	339.908	33.5002	48.5251	27.5095	18.9781	55.4479	11.2705	6.91255	10.4473	8.85647	9.56925	6.89775	15.2422	7.55484	14.3785	2.11085	0.408376
57	64	1	1	1	0	1	1	0	1	0	0	1	1	0	0	0	0	0	0	0	0	0	0	0	0	1	0	2	6.74601	4.91389	6.41342	17.0345	7.99144	16.0159	8.92276	20.8219	8.10468	10.9278	2.78285	2.4801	5.08661	11.6906	7.7653	4.88537	9.09741	4.98064	2.5681	3.76444	4.97522
58	46	1	0	0	0	0	0	0	0	0	0	0	0	0	0	0	0	0	0	0	0	0	0	0	1	0	0	8	6.5806	3.15634	5.48447	15.9012	6.38287	13.8477	10.1603	24.3719	10.8675	15.7701	2.50994	3.04087	7.43311	13.6755	8.33832	5.63695	8.72734	6.14236	6.82543	3.86886	5.12484
59	78	1	0	0	0	1	1	0	1	0	NA	0	0	0	0	0	0	1	0	0	0	0	0	1	1	0	0	16	209.73	202.024	164.688	133.753	379.891	13.7518	55.315	38.0971	48.544	112.266	16.9099	0.556666	2.75577	6.43564	5.54019	2.02936	8.06767	2.1687	30.9109	86.3112	13.0306
60	71	1	1	0	1	1	0	0	0	0	0	0	0	0	0	0	0	0	0	0	0	0	0	0	0	1	0	23	359.047	287.347	177.792	137.549	584.222	243.269	81.147	78.5227	105.421	37.1201	5.9778	4.14539	7.53265	-9.51498	5.90142	12.7299	21.534	8.47842	29.6351	4.72722	92.9657
61	73	1	0	0	0	0	0	0	0	0	0	0	0	0	0	0	0	0	0	0	0	0	0	0	1	0	0	15	11.9059	3.85656	10.8734	13.3881	7.01135	48.5962	24.8852	41.7293	24.7319	28.6826	5.74073	5.67599	5.31381	8.95836	17.4134	8.0839	17.6876	8.17737	2.85542	3.29427	3.73664
62	43	0	0	0	0	1	0	0	0	1	0	0	0	0	0	0	0	0	1	0	0	0	0	0	0	1	0	7	13.0989	4.15866	9.521	17.1841	26.6881	6.91751	18.9247	35.4095	17.5227	29.2973	1.94194	1.702	3.47426	12.9272	16.2642	3.80847	11.5825	5.25846	6.33546	2.79605	4.2768
63	88	1	1	0	1	0	0	0	0	1	1	0	0	0	0	0	0	0	0	0	0	0	0	0	0	1	0	9	4.96808	3.15555	6.07632	13.0026	5.87914	14.6583	21.7799	28.9608	15.668	10.3735	2.51518	2.78542	2.93074	8.00745	5.55853	3.89699	13.4024	5.41746	2.86536	2.8098	3.55318
64	39	0	NA	NA	NA	0	1	0	1	1	1	0	0	0	0	0	0	0	0	0	0	0	0	0	0	1	0	19	11.521	5.74045	9.68987	21.4115	26.5364	13.5926	20.8545	27.8203	14.7207	11.6734	4.03153	5.04997	9.1796	9.86544	9.77011	8.69787	12.7626	7.80925	61.1707	27.8024	5.68144
65	71	0	0	0	0	0	1	0	1	0	0	0	0	0	0	0	0	0	0	0	0	1	0	1	0	1	0	9	29.1529	12.2871	12.3412	17.3283	310.111	37.3605	34.4817	25.9757	28.1348	39.3593	9.79233	6.85303	4.78081	114.955	7.94527	9.37959	13.8417	7.29968	10.2714	3.13534	6.67888
66	49	1	0	0	0	1	0	0	0	1	0	0	0	0	0	0	0	0	0	0	0	1	0	0	0	1	0	9	5.73412	3.29869	9.86425	15.8592	89.958	13.1888	29.7244	27.7029	11.9801	57.6439	4.47025	9.95091	7.02398	44.6916	16.5639	3.82256	21.2394	6.09408	7.48194	1.56305	1.97168
67	91	1	0	0	0	1	1	0	1	0	1	0	0	0	0	0	0	0	0	0	0	1	0	0	0	0	1	6	3.98747	5.03377	5.19234	14.3823	12.3071	8.1202	6.66026	23.4482	8.20363	22.2391	3.25339	4.4138	3.68156	15.9619	41.1566	5.19225	12.6788	5.11804	8.06213	4.255	6.57184
68	54	1	1	0	1	0	0	0	0	0	0	0	0	0	0	0	0	0	0	0	0	0	0	0	0	1	0	10	17.1691	3.96887	11.9257	19.8928	45.716	8.61983	20.9753	24.4092	30.5085	26.5748	6.32571	4.17834	4.67927	11.3186	12.4602	5.42454	10.8169	5.54647	7.48126	1.1664	3.74972
69	53	0	0	0	0	0	1	0	0	1	0	0	0	0	0	0	1	0	0	0	0	1	0	1	0	1	0	13	168.488	143.684	188.478	87.4002	531.407	35.0739	13.6941	17.6602	13.0131	318.563	57.619	32.3742	11.9257	-9.92653	13.2401	7.45596	12.7055	6.55283	26.7442	14.9967	9.13439
70	63	0	0	0	0	0	0	0	0	0	0	0	0	0	0	0	0	0	0	0	0	0	0	0	0	1	0	10	25.4669	24.321	10.0496	12.2345	88.2719	74.6267	6.79259	29.0305	8.96943	20.219	3.40084	5.38394	4.39149	15.0699	6.40281	3.84519	10.3059	4.50379	77.4562	25.9706	8.63589
71	71	1	1	0	1	1	1	0	1	0	0	0	0	0	0	0	0	1	1	1	1	0	0	0	0	1	0	15	38.3592	38.1779	11.1313	15.8631	155.282	72.6134	7.26986	28.7353	9.71443	20.0386	2.37692	7.1871	4.26962	44.621	6.19124	4.70035	10.4875	4.85407	159.232	52.4575	17.6861
72	73	0	0	0	0	1	1	0	1	0	0	0	0	0	0	0	0	0	0	1	0	0	0	1	1	0	0	2	10.7412	3.88454	12.9105	17.1535	19.4648	13.7004	8.87464	31.1411	15.3164	41.6446	9.16063	7.67569	4.19162	73.7111	6.90748	3.74139	9.3442	4.25658	8.59393	2.26324	7.5751
73	74	1	0	0	0	0	0	0	0	1	0	0	0	0	0	0	0	0	0	0	0	0	0	0	0	1	0	14	8.3899	45.4868	6.18117	20.7393	59.1542	16.759	10.4632	28.9386	14.656	16.5711	0.689211	6.00619	4.04974	9.52999	9.8861	5.80361	11.9974	6.22631	8.99068	4.95613	4.73548
74	65	0	0	0	0	1	0	0	0	0	0	0	0	0	0	0	0	0	0	0	0	1	0	0	0	1	0	13	85.9258	51.0581	366.302	98.0955	191.79	32.6259	54.4818	23.5322	39.9387	76.5396	22.7712	31.3621	28.3004	15.4773	8.79598	21.357	11.3481	12.4854	103.55	17.5434	37.7852
75	82	0	0	0	0	1	0	0	0	0	NA	0	0	0	0	0	0	0	0	0	0	0	0	0	1	0	0	16	8.81363	3.43489	5.54167	13.6899	20.2519	38.7358	17.3764	34.8397	10.8511	86.0388	3.35194	3.83212	5.44987	19.081	21.1094	5.6708	11.6148	6.59739	19.3513	3.51919	6.61728
76	51	1	0	0	0	0	0	0	0	0	0	0	0	0	0	0	0	0	0	0	0	0	0	0	0	1	0	9	14.3557	5.14365	220.126	59.5672	0.377179	7.24331	14.7919	25.9997	12.609	44.0821	7.2046	5.05484	5.88486	20.7857	18.5922	8.63386	11.7479	8.67636	65.2397	14.6563	3.85059
77	55	1	1	0	1	0	1	0	1	0	0	0	0	0	0	0	0	0	0	0	0	0	0	0	1	0	0	12	159.145	121.838	209.313	81.3217	504.759	13.636	128.141	28.927	104.159	247.784	59.458	73.9891	36.6372	7.89353	9.1579	6.76017	76.9407	7.82868	50.7066	23.4207	7.9133
78	32	1	0	0	0	0	1	0	1	0	0	0	0	0	0	0	0	0	0	0	0	0	0	0	0	1	0	3	17.8298	8.29828	13.6036	16.9162	302.223	20.8447	36.2174	31.7966	21.5854	102.117	25.5603	10.9128	10.42	87.447	23.707	10.7092	13.7555	7.86478	11.2405	4.66937	6.04993
79	62	0	0	0	0	0	0	0	0	0	0	1	0	0	1	0	0	1	0	0	0	0	0	1	0	1	0	14	60.0616	34.6967	35.4069	21.9655	198.993	13.1763	9.95308	21.6821	11.169	177.974	47.2934	8.38924	5.05329	14.0434	6.95948	4.64753	8.78789	4.36377	44.8897	6.03692	22.5685
80	61	0	0	0	0	1	0	0	0	0	1	0	0	0	0	0	0	0	0	0	0	0	0	1	0	1	0	28	256.305	181.801	217.853	79.7158	495.15	19.0991	54.8107	30.3295	37.3125	208.293	87.0998	18.3414	14.9458	52.898	15.3331	3.58622	11.2296	4.54094	122.89	13.8008	-9.81764
81	54	0	0	0	0	0	1	0	1	0	1	0	0	0	1	0	0	0	0	0	0	0	1	0	0	1	0	19	36.607	12.8689	24.3548	31.0584	103.059	42.9843	32.1021	44.1582	34.6541	67.3351	19.1934	4.30659	7.16366	24.1333	23.2539	5.03978	10.618	4.47757	31.5751	10.2551	6.9754
82	54	1	1	0	1	0	0	0	0	0	0	0	0	0	0	0	0	0	0	0	0	0	0	0	1	0	0	11	32.7441	13.7399	13.24	25.5889	55.3627	11.2198	14.1146	25.3781	22.5418	30.5025	7.68337	20.5869	12.1178	12.1553	55.1368	3.41166	8.82642	3.28428	14.6572	4.45676	9.89865
83	29	1	1	0	1	1	0	0	0	0	0	1	1	0	0	0	0	0	0	0	0	1	0	1	0	1	0	25	83.7294	110.085	402.931	149.715	436.652	14.1588	47.2193	47.6108	30.5386	47.2625	14.2981	-1.18721	8.36917	25.3919	25.5593	6.10202	11.2773	6.08596	289.647	135.87	-19.1124
84	45	1	1	0	1	1	1	0	1	0	1	0	0	0	0	0	0	0	0	0	0	0	0	0	0	1	0	19	109.866	167.827	445.099	203.989	416.298	0.957161	80.341	28.1214	61.4602	539.377	240.228	102.784	46.2133	133.065	423.455	2.39032	8.93937	3.09154	18.6778	10.6198	2.43091
85	42	0	1	0	1	1	0	0	0	0	0	0	0	0	0	0	0	0	0	0	0	1	1	0	0	1	0	11	28.3478	10.4251	167.484	69.4059	561.863	-0.0210741	19.7917	23.2278	27.9912	60.824	20.5526	22.535	12.1921	-0.619152	106.659	6.22679	9.93899	6.02971	127.636	41.6534	2.13142
86	43	0	1	0	1	0	0	0	0	1	0	0	0	0	0	0	0	0	0	0	0	0	0	0	0	1	0	33	381.467	316.175	395.847	186.704	555.868	8.00753	62.0567	27.3432	57.6763	31.0274	7.1015	-5.05331	1.71656	-9.28988	17.0923	2.93574	10.8272	2.93541	-3.64304	15.9839	11.4005
87	83	0	1	0	1	1	0	0	0	0	0	0	0	0	0	0	0	0	1	0	0	1	0	1	0	1	0	13	8.67328	4.14189	31.0759	23.9975	354.401	60.0625	12.2802	22.1658	10.766	49.9448	4.86492	13.9051	9.20628	7.39155	16.9546	6.56902	16.2282	7.0893	20.3518	8.85419	5.15078
88	72	0	1	0	1	0	1	0	1	1	0	0	0	0	1	0	0	0	0	0	0	0	0	1	0	1	0	37	209.925	130.704	84.7056	48.0694	472.928	10.422	32.3109	23.4282	31.8347	13.4969	-0.66373	0.181766	2.19993	39.4905	11.8854	3.45295	8.16551	2.86697	53.3204	11.6352	2.22744
89	69	0	0	0	0	1	0	0	0	1	1	0	0	0	0	0	0	0	0	0	0	1	0	0	0	0	1	6	41.9711	29.1982	17.3128	19.8295	461.196	7.80223	19.4973	15.9412	16.9024	66.8883	18.2972	12.4196	10.2959	14.5464	8.06072	8.79077	14.6636	8.65356	223.126	77.4898	4.13936
90	76	1	1	0	1	1	1	0	1	0	1	0	0	0	0	1	0	0	0	0	0	0	0	1	1	0	0	5	5.55624	3.66328	5.08968	13.2624	224.455	6.20736	11.4283	26.4778	10.2099	16.2756	2.3263	2.99325	5.3846	153.245	14.6239	4.58144	9.37651	4.75074	3.6527	2.02341	2.06806
91	54	1	1	0	1	1	0	0	0	1	0	0	0	0	0	0	0	0	0	0	0	0	1	1	0	1	0	18	196.606	131.475	53.5486	38.8561	493.751	73.084	19.9519	27.596	25.1212	54.8674	11.5267	12.0069	7.44816	12.0716	7.95598	3.992	9.315	4.73504	29.1511	15.6936	4.40403
92	69	0	0	0	0	0	0	0	0	0	0	0	0	0	0	1	0	0	0	0	0	0	0	0	0	1	0	13	154.126	104.986	321.709	128.759	475.961	66.2617	45.1663	48.2384	31.4705	132.116	54.068	-1.40634	2.54126	0.00907687	12.4262	3.56896	8.27088	3.52799	9.74008	2.10415	-4.63782
93	43	0	0	0	0	0	1	1	0	0	0	0	0	0	0	0	0	0	0	0	0	1	0	0	0	1	0	23	206.242	130.832	82.381	43.7207	486.629	6.92386	14.62	21.5764	11.3881	49.313	29.1621	4.0815	5.7869	0.32647	3.10004	4.68503	9.48279	4.8889	27.943	1.81139	9.17017
94	37.2329	1	0	0	0	0	0	0	0	1	0	0	0	0	0	0	0	0	0	0	0	0	0	0	0	0	1	11	334.092	223.672	107.295	148.986	273.861	53.7205	167.561	24.4375	119.487	34.0307	16.1959	55.3725	47.9019	28.6016	18.5965	13.9442	16.8104	15.4855	38.1645	19.9159	190.691
95	70.4219	1	0	0	0	0	1	0	1	0	0	0	0	1	0	0	0	1	0	1	0	0	1	0	0	0	1	5	329.561	43.9272	78.8034	47.0716	415.427	10.8257	70.8071	26.0032	37.3566	26.6329	23.6895	12.8876	20.6396	8.04374	45.6888	17.0763	15.3072	18.6357	22.3221	9.60171	12.3461
96	42.3397	0	0	0	0	0	0	0	0	1	0	0	0	0	0	0	0	0	0	0	0	0	0	0	0	0	1	11	94.8938	39.1029	110.733	50.6197	50.0407	138.324	145.586	17.6675	98.0185	51.2526	26.3655	19.5933	29.0259	41.9178	118.707	20.3698	18.2478	22.2302	22.0924	5.47248	21.8184
97	63.4466	1	1	0	1	1	1	0	1	1	0	0	0	0	0	0	0	1	1	0	0	0	0	1	0	0	1	6	12.9311	5.96802	14.7561	18.3803	9.03703	48.1319	32.9559	30.5773	19.3988	18.1249	8.93934	11.1317	16.8532	15.1631	13.6594	16.3616	14.8726	14.8766	22.2498	9.58093	6.38781
98	55.0466	1	0	0	0	0	1	0	1	0	1	0	0	0	0	0	0	0	0	0	0	0	0	1	0	0	1	11	207.599	390.012	249.962	279.623	380.696	61.3069	195.965	23.222	113.102	43.3382	-3.44163	14.3403	14.1229	0.802897	34.9919	22.1293	29.6812	21.4878	209.073	41.1558	80.4486
99	48.1507	1	0	0	0	1	0	0	0	1	0	0	0	0	0	0	0	0	0	0	0	0	0	0	0	0	1	7	254.882	120.591	158.654	92.4873	278.547	22.1829	50.6782	13.4502	16.6952	137.083	66.6149	24.9891	30.5321	50.2759	59.3872	22.0456	18.4782	17.8028	48.3266	21.349	-55.7218
100	53.5918	0	0	0	0	0	1	0	1	1	0	0	0	0	0	0	0	0	0	0	0	0	0	0	0	0	1	8	90.9119	35.5408	120.884	45.3728	347.286	20.1927	80.364	21.1657	48.2157	73.6607	36.3026	17.2255	27.1758	0.0712982	22.9014	21.6632	18.683	20.3009	63.2405	12.1489	5.32603
101	54.4027	1	0	0	0	1	0	0	0	1	0	0	0	0	0	0	0	0	0	0	0	0	0	0	0	0	1	7	205.307	63.0296	175.389	115.317	339.764	22.352	223.696	38.0269	146.228	48.9976	19.5987	122.9	130.421	-1.4905	23.3518	18.8287	17.1873	19.434	138.127	31.6662	22.836
102	64.9205	1	0	0	0	0	0	0	0	0	0	0	0	0	0	0	0	0	0	0	0	0	0	0	0	0	1	8	364.921	269.047	403.491	302.743	167.129	149.908	260.61	22.6866	83.2656	32.0803	15.7814	27.7359	36.3467	18.4681	164.23	12.5937	17.5808	16.8925	108.092	41.2495	55.9732
103	74.6192	1	0	0	0	1	0	0	0	0	1	1	0	0	0	0	0	0	0	0	0	0	0	0	0	0	1	7	86.6408	11.1702	8.63953	11.2677	35.7712	38.1221	38.6821	10.7198	14.6208	43.7079	21.9651	27.9099	33.9638	52.1496	14.9912	24.6943	16.5608	23.8938	122.46	13.7792	194.206
104	63.6712	1	0	0	0	1	0	0	0	1	0	0	0	0	0	0	0	0	0	0	0	1	0	0	0	0	1	9	25.343	22.7765	26.4838	14.8112	331.039	10.5685	66.5328	16.0996	50.9716	80.4204	43.9561	14.1736	22.0179	-9.39857	24.0416	14.7339	15.5945	15.5673	157.103	5.70838	97.3423
105	53.3726	0	0	0	0	0	1	0	1	1	0	0	0	0	0	0	0	1	0	0	0	0	0	0	0	0	1	11	74.1249	51.433	89.1764	53.5469	11.6994	18.2724	130.465	15.1429	96.938	74.169	30.0634	11.4928	20.1277	11.7805	15.1671	14.715	16.2541	14.9291	72.5427	15.7727	36.7639
106	61	1	1	0	1	0	0	0	0	1	1	0	0	0	0	0	0	0	0	0	0	0	0	0	0	0	1	9	115.676	42.7525	68.6471	29.4364	67.6881	19.3382	60.098	16.7034	52.0534	120.753	60.9427	15.3996	23.7717	16.073	19.5407	18.7047	16.1917	17.4617	15.1358	4.77131	5.65802
107	25.0493	1	0	0	0	0	0	0	0	1	0	0	0	0	0	0	0	0	0	0	0	0	0	0	0	0	1	7	350.83	198.084	246.686	166.641	267.86	53.7166	230.641	31.7697	110.012	99.614	49.9478	11.5982	29.1682	10.5064	28.2148	19.4704	23.5226	20.9698	20.1741	11.7284	1.59777
108	52.9726	1	0	0	0	0	0	0	0	0	1	0	0	0	0	0	0	0	0	0	0	0	0	0	0	0	1	13	290.1	182.105	114.29	102.731	221.501	14.4331	71.1477	18.1738	33.4266	67.1915	29.0725	14.4737	27.7244	8.73765	21.2192	17.8658	18.7896	18.458	86.8264	43.172	54.3908
109	70.7288	0	0	0	0	0	0	0	0	0	0	0	0	0	0	0	0	0	0	0	0	0	0	0	0	0	1	6	216.538	53.1418	71.4346	44.8308	84.6014	10.5875	59.3141	16.6467	27.52	29.8199	14.7007	6.9616	17.2289	12.7858	18.8069	18.0455	17.0193	16.0174	32.8183	10.0849	13.5617
110	43.3288	1	0	0	0	0	0	0	0	1	0	0	0	0	0	0	0	0	0	0	0	0	0	0	0	0	1	13	304.803	167.046	165.82	89.5839	165.274	75.2198	158.301	13.3962	74.8377	36.948	31.1467	73.8179	87.9818	13.8595	24.3697	23.0895	15.8452	21.1667	88.4484	14.4471	46.0741
111	74.2904	1	1	0	1	1	1	0	1	0	1	0	0	1	0	0	0	0	0	0	0	0	0	0	0	0	1	12	232.097	117.187	69.4028	36.0164	287.611	0.0489344	129.294	17.2891	58.9782	53.4969	29.3647	8.01092	21.1172	3.78738	11.0924	17.4635	17.8075	18.1725	37.2867	7.71791	4.58765
112	54.389	1	0	0	0	1	0	0	0	0	1	0	0	0	0	0	1	0	0	0	0	1	0	0	0	0	1	8	62.9859	20.4828	46.7549	64.976	38.6577	32.4162	57.9782	12.1811	47.2582	89.552	34.2029	13.5568	18.5	13.7844	21.3832	20.1143	15.1043	17.8384	54.3348	17.826	36.9027
113	59.674	0	0	0	0	1	1	0	1	1	0	0	0	0	0	0	0	0	0	0	0	0	0	0	0	0	1	12	340.842	187.132	50.0074	68.2274	130.196	9.3474	73.3844	9.48115	54.926	31.6711	12.2866	11.8504	18.5926	11.5755	14.3768	23.2983	17.3555	18.3577	12.9459	6.80176	13.8289
114	72	1	0	0	0	1	1	0	1	0	1	0	0	0	0	0	0	0	0	0	0	0	0	1	0	0	1	7	274.294	163.394	296.86	153.197	146.74	20.2572	55.4481	16.5963	24.1682	64.2445	28.817	13.31	24.3245	13.7971	27.9281	20.7198	18.2677	20.7907	37.2502	15.211	-31.0094
115	58.1041	1	0	0	0	1	0	0	0	0	1	0	0	0	0	0	0	0	0	0	0	0	0	0	0	0	1	13	257.842	168.238	372.161	267.604	212.957	9.79455	228.479	13.1602	119.684	86.0846	36.7179	-13.3054	4.77045	2.32407	17.7426	13.9371	17.5942	16.9724	73.2176	22.2428	-98.5467
116	53.8521	0	0	0	0	0	0	0	0	0	1	0	0	0	0	0	0	1	0	0	0	0	0	0	0	0	1	5	159.428	79.5757	384.815	209.517	61.9142	22.0265	204.847	17.0633	125.423	288.67	97.8262	24.6299	29.7366	74.5576	77.4644	24.1421	18.1505	21.3913	29.9186	18.8726	2.5617
117	33.3589	0	0	0	0	1	1	0	1	1	0	0	0	0	0	0	0	0	0	0	0	0	0	0	0	0	1	8	133.667	91.9462	232.678	167.625	130.73	17.6254	284.505	37.0954	126.416	191.505	52.1632	8.21997	22.4108	8.54467	19.2017	10.0369	19.04	15.5915	95.1698	31.2278	-2.4923
118	39.8521	1	0	0	0	1	0	0	0	0	1	0	0	0	0	0	0	0	0	0	0	0	0	0	0	0	1	8	303.689	177.721	349.022	187.681	184.579	11.5616	170.867	11.7997	126.013	141.611	46.2273	36.0754	48.8613	13.6968	69.3763	17.3179	11.2632	32.5822	15.9805	3.75589	-3.16231
119	66.3945	0	0	0	0	1	0	0	0	1	0	1	0	0	0	0	0	0	0	0	0	0	0	0	0	0	1	14	333.207	322.589	281.643	323.752	230.791	36.0563	301.632	21.179	112.571	9.19541	1.93027	-2.78912	17.7529	29.3826	11.6132	-0.133079	6.89601	6.93896	52.1499	22.5227	72.5853
120	50.3781	1	0	0	0	1	1	0	1	0	1	0	0	1	0	0	0	0	0	0	0	0	0	0	0	0	1	11	285.301	168.049	386.206	221.813	158.951	12.705	194.318	30.3811	118.439	25.6274	7.74994	16.2303	14.6849	-7.40708	14.145	2.01163	5.79341	5.09253	45.1844	16.3775	2.44349
121	57.9096	1	0	0	0	1	0	0	0	0	1	0	0	0	0	0	0	0	0	0	0	0	0	0	0	0	1	14	278.483	185.714	137.123	107.359	46.2827	7.84657	211.698	9.70191	99.71	121.222	20.9755	6.02891	9.57536	17.5567	8.7626	4.54212	7.93542	5.00236	21.2845	10.844	11.1055
122	51.9616	1	0	0	0	0	0	0	0	1	0	0	0	0	0	0	0	0	0	0	0	0	0	0	0	0	1	11	208.906	150.496	248.051	132.176	239.974	39.1083	184.146	12.1043	109.311	278.132	119.457	12.5671	53.5031	16.2214	10.1284	1.19086	6.52909	4.52487	52.9064	17.6928	50.7774
123	48.6	1	0	0	0	0	1	0	1	1	0	0	0	0	0	0	0	0	0	0	0	0	0	0	0	0	1	7	259.415	162.396	286.049	246.703	98.5681	11.6233	244.083	9.99666	90.5493	67.2854	24.019	-4.67845	3.6214	25.7434	10.0962	1.97902	8.42961	5.38484	70.0542	37.8927	8.21241
124	59.9096	1	0	0	0	1	0	0	0	0	1	1	0	0	0	0	0	0	0	0	0	1	0	0	0	0	1	7	334.061	181.572	165.651	93.2555	474.242	18.7375	56.8335	20.9173	31.7623	75.7635	22.2748	3.19832	26.9556	77.0936	38.8811	9.14689	8.04289	8.72472	116.344	32.6261	38.182
125	31.9315	1	0	0	0	0	0	0	0	0	1	0	0	0	0	0	0	0	0	0	0	0	0	0	0	0	1	6	381.411	226.394	257.621	140.433	473.389	15.1995	239.931	52.0291	121.894	138.043	52.914	11.1235	22.0853	-10.2763	17.9111	5.69208	4.74798	9.01686	36.4665	32.5999	48.7652
126	55.8329	1	1	0	1	1	0	0	0	1	0	0	0	0	0	0	0	0	0	0	0	0	0	1	0	0	1	15	400.253	238.901	128.028	97.6934	273.127	8.33135	116.802	32.7046	88.9885	27.2061	28.1418	2.66663	89.7226	24.8398	9.1803	5.36147	7.16409	5.99721	32.2666	20.1271	244.18
127	50.8877	1	0	0	0	1	0	0	0	1	0	0	0	0	0	0	1	0	0	0	0	1	0	0	0	0	1	21	165.898	104.684	186.787	87.8208	155.773	7.73971	112.843	20.7467	38.4192	81.6025	24.4928	20.3065	13.3992	23.2076	11.8479	2.20688	6.45214	5.03706	179.65	43.5505	17.8001
128	55.3205	1	1	0	1	1	1	0	1	1	0	0	0	0	0	0	0	0	0	0	0	0	0	0	0	0	1	13	127.717	61.0847	252.864	176.613	83.6826	18.5436	241.294	57.6563	137.798	423.796	177.387	4.81436	12.2537	10.0085	14.994	5.85223	8.3609	6.82194	18.7902	13.3522	19.6766
129	41.9288	1	0	0	0	1	1	0	1	1	0	0	0	0	0	0	0	0	0	0	0	0	0	0	0	0	1	11	381.025	278.319	526.429	389.806	416.327	32.7204	323.561	63.5372	147.118	197.464	66.6473	4.40031	15.1697	0.976657	24.463	5.49975	10.2342	6.05447	15.9065	9.78873	-60.8335
130	57.0466	0	0	0	0	1	0	0	0	1	0	0	0	0	0	0	0	0	0	0	0	0	0	0	0	0	1	8	400.308	282.154	252.21	189.528	386.888	9.24172	131.349	49.5152	84.7939	30.4838	11.819	298.498	202.57	71.2711	69.3619	26.0611	62.7774	39.8758	-19.4916	-0.289839	-37.2335
131	57.1178	1	0	0	0	0	0	0	0	0	1	0	0	0	0	0	0	0	0	0	0	0	0	0	0	0	1	7	202.857	149.571	478.18	418.812	324.919	34.6601	430.552	16.1549	137.392	333.548	215.382	28.9356	68.9451	-2.19011	27.4926	2.80994	7.53203	8.36879	80.9289	33.0486	-30.0576
132	62.1151	0	0	0	0	1	0	0	0	0	1	0	0	0	0	0	0	1	0	0	0	0	0	0	0	0	1	11	322.413	264.111	290.076	201.391	329.826	9.20607	152.877	25.9653	32.277	34.85	10.0088	24.2077	26.0183	1.79559	24.3679	15.4693	26.802	14.0102	74.2269	19.6301	4.73102
133	55.2411	0	0	0	0	0	0	0	0	1	0	0	0	0	0	0	0	0	0	0	0	0	0	0	0	0	1	17	326.445	283.804	404.882	368.793	286.045	22.8085	268.62	25.7956	88.9748	182.706	33.3619	33.8997	55.5333	75.3616	25.8625	10.9875	10.7537	32.7103	14.7023	10.0815	-46.1075
134	46.3808	1	0	0	0	1	0	0	0	1	0	0	0	0	0	0	0	0	0	0	0	0	0	0	0	0	1	17	216.146	139.983	215.165	104.021	217.49	6.99178	202.164	56.8488	74.7081	127.559	59.9051	71.6915	52.2062	-12.1935	14.3767	5.92627	8.44019	7.95616	28.949	15.1892	11.305
135	62.4219	0	0	0	0	1	1	0	1	1	0	0	0	0	0	0	1	0	0	0	1	1	0	0	0	0	1	7	7.628	4.38215	12.9871	13.6194	12.231	13.8008	26.034	15.4844	15.9974	12.0246	5.00903	3.58328	10.4473	9.8328	14.0246	9.99627	8.35532	9.447	9.2372	3.58105	4.3174
136	54.0575	1	0	0	0	0	0	0	0	0	1	0	0	0	0	0	0	0	0	0	0	0	0	0	0	0	1	21	364.311	308.125	342.039	219.112	303.156	17.9906	103.755	16.0745	69.4356	120.207	63.9667	4.49219	87.0242	-8.14824	21.9532	74.9708	85.0045	58.4984	-13.8062	-9.00169	-70.1447
137	61	1	0	0	0	0	0	0	0	0	0	0	0	0	0	0	0	0	0	0	0	0	0	0	0	0	1	13	280.362	257.325	373.232	344.808	294.48	19.7592	317.298	23.0005	141.338	66.3622	25.5263	4.81003	14.385	0.0604231	9.30014	1.24782	6.83146	4.80671	223.893	126.77	2.79112
138	58.3918	1	0	0	0	1	0	0	0	0	1	0	0	0	0	0	0	0	0	0	0	0	0	0	0	0	1	2	247.366	225.864	114.402	167.999	337.837	33.7671	111.171	75.495	71.9995	87.3331	39.3081	30.2495	31.3278	-1.22756	106.003	19.447	15.5113	15.5671	16.8432	41.8713	5.00661
139	63.1452	0	0	0	0	0	1	0	1	0	0	0	0	0	0	0	0	0	0	0	0	0	0	0	0	0	1	9	296.466	212.371	148.992	117.045	220.875	10.6877	138.866	61.029	84.9535	36.7366	19.1749	11.769	22.4279	8.66303	14.1378	17.5454	12.9444	14.5513	97.0612	25.1871	30.2216
140	61.8164	1	0	0	0	1	0	0	0	0	1	0	0	0	0	0	1	0	0	0	0	0	0	0	0	0	1	22	194.599	207.871	111.059	103.451	246.955	60.432	104.291	35.3296	44.8883	178.304	64.0558	330.351	325.034	-2.86779	20.6709	9.21287	10.087	10.1381	46.1013	17.1936	100.868
141	35.8932	1	0	0	0	0	0	0	0	0	1	0	0	0	0	0	0	0	0	0	0	0	0	0	0	0	1	10	214.37	215.205	379.398	354.238	264.198	11.0871	76.1434	20.2477	57.3705	39.5456	13.2454	3.42347	4.51551	9.39596	9.61251	4.35999	7.94896	6.86469	-12.4764	54.3875	-1.60912
142	76.0055	1	0	0	0	0	0	0	0	0	1	0	0	0	0	0	0	0	0	0	0	0	0	0	0	0	1	6	20.6327	18.0059	18.3967	19.5822	60.7793	4.10561	52.7656	11.8116	28.0566	392.33	97.2528	18.3511	29.7999	13.6692	30.8267	20.9027	15.9041	19.8027	13.7325	7.07988	8.98576
143	69.0219	1	0	0	0	1	1	0	1	0	1	0	0	0	0	0	0	1	0	0	0	0	0	0	0	0	1	7	313.102	272.733	489.575	409.214	208.856	39.7121	389.288	42.8896	198.282	71.4579	22.154	-1.65435	9.25555	16.8713	45.9165	11.596	21.4515	22.1661	18.1852	32.7308	-0.228409
144	35.5397	1	0	0	0	0	0	0	0	1	0	0	0	0	0	0	0	0	0	0	0	0	0	0	0	0	1	11	273.995	253.348	355.012	335.131	169.172	19.4647	118.934	24.3486	67.0331	47.4488	11.3656	-1.34364	4.48131	2.81759	17.0732	6.24673	6.02878	6.20134	20.3267	14.0418	-16.3081
145	48	1	0	0	0	0	1	0	1	1	0	0	0	0	0	0	0	0	0	0	0	0	0	0	0	0	1	6	44.7405	10.9508	47.5234	41.0898	221.402	18.0537	119.782	38.4331	47.417	12.7198	4.26949	4.21078	10.5107	9.19147	33.869	8.27047	5.50855	9.61786	7.89315	4.564	4.8016
146	61	0	0	0	0	1	1	0	1	1	0	0	0	0	0	0	1	0	0	0	0	1	0	0	1	0	0	3	3.80292	3.12327	0.855356	14.4836	-5.13162	4.592	5.10087	16.7162	6.26353	111.976	19.4296	40.1281	62.528	14.6164	41.942	30.848	19.3383	20.4615	30.6268	4.07018	6.1592
147	29	0	0	0	0	0	0	0	0	0	0	0	0	0	0	0	0	0	0	0	0	0	0	0	1	0	0	16	43.9159	14.4249	7.42781	22.0169	31.7739	11.6017	4.40221	21.8266	6.3597	32.9913	3.28998	11.9767	7.34678	17.9901	29.7309	7.13845	8.93923	6.02413	-0.659558	1.18572	-0.495263
148	43	0	0	0	0	0	0	0	0	1	0	0	0	0	0	0	0	0	0	0	0	0	0	0	1	0	0	10	11.0538	4.1084	9.79789	24.2957	0.402418	20.1699	7.98568	23.0849	10.6373	47.8597	9.06057	4.53723	8.39479	9.8326	12.8515	4.45821	8.15656	4.57536	9.7874	4.85961	7.9447
149	31	0	0	0	0	0	0	0	0	0	0	0	0	0	0	0	0	0	0	0	0	0	0	0	1	0	0	8	4.27673	3.98859	5.45693	20.182	2.53769	9.01796	10.3614	21.7797	10.3007	15.3935	3.58893	3.01782	5.80973	5.36666	7.48503	4.14171	8.34201	4.29476	6.91931	3.78002	5.39537
150	30	0	0	0	0	0	0	0	0	0	0	0	0	0	0	0	0	0	0	0	0	0	0	0	1	0	0	5	6.92633	4.31679	8.81852	42.0026	3.54177	16.0032	7.88592	33.7531	11.2429	26.4405	3.00637	3.4633	8.21963	11.8186	15.7512	4.17347	8.93416	4.95744	7.22666	4.1982	3.16771
151	50	0	0	0	0	0	0	0	0	0	0	0	0	0	0	0	0	0	0	0	0	0	0	0	1	0	0	10	16.8126	6.33786	17.8869	24.0282	28.5926	27.4221	18.3731	27.6264	14.9452	31.2741	4.73412	9.83517	8.72403	17.7209	22.7814	7.30859	11.0583	6.95722	2.64311	2.16786	3.0503
152	43	1	0	0	0	0	0	0	0	0	0	0	0	0	0	0	0	0	0	0	0	0	0	0	1	0	0	12	3.73222	3.20051	4.71993	14.8495	5.05808	51.7055	10.5491	20.766	8.78973	37.2862	6.8746	11.066	12.741	11.3806	40.9507	5.13156	8.97137	6.03698	36.1923	12.6182	7.71783
153	27	0	0	0	0	0	0	0	0	0	0	0	0	0	0	1	0	0	0	0	0	0	0	0	1	0	0	18	22.8849	9.06449	38.0112	44.1547	16.8173	10.135	6.6187	17.3556	8.59961	28.3789	3.44401	3.92473	7.88396	4.7867	19.7268	3.74453	8.36327	4.68645	-0.46116	0.641728	3.01704
154	39	0	0	0	0	0	0	0	0	0	0	0	0	0	1	1	0	0	0	0	0	1	0	0	1	0	0	7	2.25736	4.09742	4.17452	17.7687	0.137922	8.31139	4.35639	12.2133	18.1168	31.0726	8.19534	4.52589	7.92589	8.65715	9.79799	4.00923	8.04562	4.97434	4.23275	2.35535	1.39913
155	50	0	0	0	0	0	0	0	0	0	1	0	0	0	0	0	0	0	0	0	0	0	0	0	1	0	0	1	2.97782	2.6838	5.14644	26.1491	9.23097	15.2193	16.0418	21.4902	12.2606	25.6719	3.70525	5.66253	12.8455	5.72161	10.7883	6.27978	10.3564	7.68279	2.52205	2.6561	3.04286
156	40	0	0	0	0	0	0	0	0	0	0	0	0	0	0	0	0	0	0	0	0	0	0	1	1	0	0	4	124.707	85.459	71.0287	38.0223	186.459	19.8931	12.1536	23.8843	13.2217	13.5693	2.61281	2.46273	5.94187	11.4522	21.7482	3.96205	7.26161	4.85653	2.79253	1.30555	2.5066
157	55	0	0	0	0	1	1	0	1	0	0	0	0	1	0	0	0	0	0	0	0	0	0	0	1	0	0	6	6.77498	2.28541	6.03183	14.2161	4.9085	12.3933	13.4444	35.3202	9.51633	72.1895	6.93032	15.7688	11.0773	10.9393	5.63449	5.28584	35.8786	9.36148	3.17363	1.86477	0.317727
158	41	1	0	0	0	0	0	0	0	0	0	0	0	0	0	0	0	0	0	0	0	0	0	0	1	0	0	4	70.966	28.8531	162.95	100.329	407.13	9.9713	9.26102	17.5731	13.272	11.7151	2.32522	-0.302779	4.187	9.6515	10.1318	3.67612	5.69009	4.39381	4.1942	0.83963	0.104626
159	60	0	0	0	0	0	0	0	0	0	0	0	0	0	0	1	0	0	0	0	0	0	0	0	1	0	0	2	13.7036	3.70832	5.77145	12.9346	94.7649	20.0228	9.682	25.7188	13.1688	159.401	66.6032	6.19501	8.3337	-11.6131	11.0935	3.87136	7.57636	3.65915	24.0507	9.53633	10.8091
160	53	1	0	0	0	0	1	0	1	0	0	0	0	0	0	0	0	1	0	1	0	0	0	0	1	0	0	10	119.115	58.0362	76.9257	42.0932	23.7127	7.08458	25.3314	13.9812	44.5299	42.3258	8.37949	1.56199	5.99186	63.5786	10.224	2.86809	5.86364	3.46351	8.37329	1.0886	3.42622
161	32	0	0	0	0	0	0	0	0	0	0	0	0	0	0	0	0	0	0	0	0	0	0	0	1	0	0	7	5.82831	1.99488	1.54839	38.8715	5.30559	9.01315	4.47813	13.4222	7.55501	87.0216	17.8851	5.42967	6.64414	226.053	13.4115	4.54111	8.22986	4.03115	13.7429	3.12162	14.9912
162	24	0	0	0	0	0	0	0	0	0	0	0	0	0	0	0	0	1	0	0	0	0	0	0	1	0	0	9	9.69871	3.34909	2.84539	12.5643	70.3719	5.23697	13.9266	31.9596	10.7514	13.454	2.06284	1.75574	4.22769	13.8865	24.0036	4.19281	6.82159	4.3835	1.23707	1.31503	0.824335
163	57	1	0	0	0	0	1	0	1	0	1	0	0	0	0	0	0	0	0	0	0	0	0	1	1	0	0	5	134.798	34.4642	58.2415	30.9843	8.74241	17.1006	38.2015	25.1587	29.6936	85.6816	27.3941	4.42461	4.51938	17.3535	5.50822	3.59122	6.69347	4.29268	11.6854	3.17435	4.47315
164	33	1	0	0	0	0	0	0	0	0	0	0	0	0	0	0	0	0	0	0	0	0	0	0	1	0	0	8	7.41759	2.38439	24.3117	22.0301	212.51	38.1798	18.481	26.51	21.3007	42.5022	15.2112	57.7753	37.3113	12.1402	8.3432	6.50245	8.44668	8.04941	77.3413	37.3134	6.91983
165	54	1	0	0	0	0	0	0	0	0	0	0	0	0	0	0	0	1	0	0	0	0	0	0	1	0	0	7	2.54123	0.9391	0.0876	8.3754	0.456511	8.78462	4.83607	13.1542	5.6695	53.9731	10.8882	6.93858	6.29258	136.646	21.7455	5.37454	13.4694	4.07774	1.55791	1.01659	1.40379
166	28	0	0	0	0	0	0	0	0	0	0	1	1	0	0	0	1	0	0	0	0	0	0	0	1	0	0	9	9.0967	0.974207	8.46199	16.7675	10.5386	5.54761	15.3753	30.5925	17.3963	14.3271	2.47004	5.20956	7.13282	9.80755	8.27965	4.52888	7.54716	5.40262	2.20888	0.712365	2.73022
167	57	1	0	0	0	0	0	0	0	0	0	0	0	0	0	1	0	1	0	0	0	0	0	0	1	0	0	7	8.34564	2.87469	9.3853	17.6657	8.45622	10.0757	8.85369	19.0228	9.42741	8.25626	1.97872	-0.196245	2.76027	7.18811	5.59041	3.6906	6.46601	3.79392	3.02632	2.43262	3.94443
[truncated: 6 more columns]
